# Supplementary material
Source: PubMed Central journal article supplement (PMC3790056)

## Supplementary Information

### Supplementary Methods

#### Materials

Yeast cells were grown in rich medium (YPD: 1% yeast extract, 2% peptone, and 2% glucose), lactate medium (YPL: 1% yeast extract, 2% peptone, and 2% lactate), synthetic minimal medium with glucose (SMD: 0.67% yeast nitrogen base, 2% glucose, and amino acids) or synthetic minimal medium with lactate (SML: 0.67% yeast nitrogen base, 2% lactate, and amino acids). Nitrogen starvation experiments were performed in synthetic minimal medium lacking nitrogen (SD-N: 0.17% yeast nitrogen base without amino acids and ammonium sulfate and 2% glucose). Unless otherwise stated, cells were grown at 30°C.

The plasmids for expression of ProA-tagged Atg32 and HA-tagged Atg11 under the control of the *CUP1* promoter have been described previously [1]. To generate an HA-tagged Cka1 and HA-tagged Ckb1 under the control of the *CUP1* promoter, 3HA was first cloned into the *Bam*HI/*Pst*I sites of pCu414 and pCu416 to generate pCu3HA414 and pCu3HA416, respectively, and then the open reading frame of *CKA1* and *CKB1* was cloned into the *Eco*RI/*Xho*I site of pCu3HA414 and/or pCu3HA416.

Anti-Atg32 antibody [2], anti-HA antibody (Sigma-Aldrich, St. Louis, MO), anti-Pgk1 antibody (Nordic Immunological Laboratories, The Netherlands), anti-protein A antibody (GeneTex Inc., CA), and anti-GFP antibody (Takara Bio, Japan) were used for immunoblotting.

### ***In vitro* kinase assay**

N-terminal GST-tagged Cka1 and Ckb1, Sko1 (N-terminal 214 amino acids), and Atg32 (N-terminal 250 amino acids; wild-type or serine 114- and/or serine 119-to-alanine mutant) expression vectors were constructed using pGEX-4T-1 (GE Healthcare, UK) and were expressed in *E. coli* BL21 (DE3). Expressed proteins were purified using glutathione Sepharose 4B (GE Healthcare). One microgram of GST-Cka1, 1  $\mu$ g of GST-Ckb1, and 2.5  $\mu$ g of GST-Sko1 or GST-Atg32 were mixed in the kinase buffer (50 mM Tris-HCl [pH 7.5], 10 mM MgCl<sub>2</sub>, and 2 mM dithiothreitol) and incubated at 30°C for 30 min together with [ $\gamma$ -<sup>32</sup>P]ATP (0.2  $\mu$ Ci/ $\mu$ l). The labeled proteins were resolved by sodium dodecyl sulfate polyacrylamide gel electrophoresis (SDS-PAGE). The gel images were visualized by BAS-2500 autoradiography (Fujifilm, Japan).

### **Supplemental Figure Legends**

#### **Supplementary Figure S1**

The indicated gene-deleted strains were cultured in YPL medium until the mid-log growth phase and then shifted to SD-N medium for 0 or 1 hour. The phosphorylation status of Atg32 was observed by immunoblotting with anti-Atg32 antibodies. If the immunoblotted bands were unclear, we repeated the experiments and show the result in panels S1–4.

### **Supplementary Figure S2**

The wild-type (WT), *cka1Δ*, *cka2Δ*, *ckb1Δ*, and *ckb2Δ* strains (BY4742) were cultured in YPL medium until the mid-log growth phase and then shifted to SD-N medium for 0, 1, or 4 hours. The phosphorylation status of Atg32 was observed by immunoblotting with anti-Atg32 and anti-Pgk1 (loading control) antibodies.

### **Supplementary Figure S3**

The wild-type (WT), *cka1Δ*, *cka2Δ*, *ckb1Δ*, *ckb2Δ*, and *ckb1Δ/ckb2Δ* strains were cultured in YPD (A) or YPL (B) until the mid-log growth phase and then cells were diluted to an OD<sub>600</sub> of 0.1 in YPD or an OD<sub>600</sub> of 0.3 in YPL. Cell growth (OD<sub>600</sub>) was observed at the indicated time.

### **Supplementary Figure S4**

The wild-type (WT), *cka1Δ*, *cka2Δ*, *ckb1Δ*, *ckb2Δ*, and *ckb1Δ/ckb2Δ* strains expressing Om45-GFP were cultured in YPD (A) or YPL (B) to the mid-log growth phase. The localization of GFP was visualized by fluorescence microscopy. DIC, differential interference contrast.

### **Supplementary Figure S5**

(A, B) Wild-type (WT) or *cka1Δ/cka2ts* (*CK2ts*) cells expressing ProA-Atg32 and HA-Atg11 were grown in SML medium until the mid-log phase at 28°C, then incubated at 37°C for 30 min, and starved in SD-N at 37°C for 1 hour (A). WT cells expressing ProA-Atg32 and HA-Atg11 were grown in SML medium until the mid-log phase and then starved in SD-N with or without 70 μM TBB for 1 hour (B). ProA-Atg32 was precipitated using IgG-Sepharose from cell lysates. An immunoblot of total cell lysate (input) and the IgG precipitates (pull-down) were probed with anti-HA and anti-Protein A antibodies.

(C) WT cells expressing Om45-GFP with empty vector, the HA-Cka1 vector, or the HA-Cka1 and HA-Ckb1 vectors were cultured in SML medium until the mid-log growth phase and then shifted to SD-N for 0, 4, or 6 hours. GFP processing and CK2 expression were observed by immunoblotting with anti-GFP, anti-HA, and anti-Pgk1 (loading control) antibodies.



### Supplementary Figure S6

(A) The wild-type (WT) (TKMY236), *atg1Δ* (TKMY256), *cka1Δ* (TKMY237), and *cka2Δ* (TKMY238) yeast strains were grown in YPD medium and shifted to SD-N for 3 or 6 hours. Samples were collected and protein extracts assayed for Pho8Δ60 activity. The results represent the mean and standard deviation of three experiments.

(B, C) Atg1 temperature-sensitive cells (*atg1Δ* strain with *atg1ts*-expressing vector, positive control) and *CK2ts* cells were cultured in SMD medium at 24°C until the mid-log growth phase and then shifted to 37°C for 4 hours (B). WT cells were cultured in YPD until the mid-log growth phase and then supplemented with 70 μM TBB or 1 mM phenylmethanesulfonyl fluoride (PMSF, positive control) and cultured for 4 hours (C). Cell lysates were analyzed for precursor Ape 1 (p-Ape1) maturation (m-Ape-1) by immunoblotting with anti-Ape1 antiserum.

### Supplementary Figure S7

Recombinant GST-Atg32 (1–250) wild-type (WT) or serine 114 and 119-to-alanine mutant (2SA) was phosphorylated by recombinant yeast CK2 supplemented with or without TBB in the presence of [ $\gamma$ -<sup>32</sup>P]ATP (A). Recombinant GST-Atg32 (1–250), the WT or SA

mutant, was phosphorylated by human CK2 supplemented with or without TBB in the presence of [ $\gamma$ - $^{32}$ P]ATP (B). Recombinant GST-Atg32 (1–250) WT was phosphorylated by recombinant Cka1 with or without recombinant Ckb1 in the presence of [ $\gamma$ - $^{32}$ P]ATP (C). The labeled proteins were resolved by SDS-PAGE, and an autoradiograph image is shown.

### **Supplementary Figure S8**

Wild-type (WT) cells expressing HA-Ckb1 and ProA-Atg32 or ProA only were grown in SMD medium until the mid-log phase and then starved in SD-N for 1 hour (A). WT cells expressing HA-Cka1 and ProA-Atg32 WT or ProA-Atg32 S114A/S119A mutant (2SA) were grown in SMD medium until the mid-log phase and then starved in SD-N for 0 or 1 hour (B). WT cells expressing HA-Cka1 and ProA-Atg32 or ProA only were grown in SML medium until the mid-log phase and then starved in SD-N for 1 hour (C). ProA-Atg32 was precipitated using IgG-Sepharose from cell lysates. The left panel shows an immunoblot of total cell lysate (input) and the right panel shows the IgG precipitates (pull-downs), which were probed with anti-HA and anti-ProA antibodies.

### **Supplementary Figure S9**

(A) The wild-type (WT), *atg32 $\Delta$* , *slt2 $\Delta$* , and *hog1 $\Delta$*  strains expressing Om45-GFP were

cultured in YPL medium until the mid-log growth phase and then shifted to SD-N for 0, 4, or 6 hours. GFP processing was monitored by immunoblotting with anti-GFP and anti-Pgk1 (loading control) antibodies.

(B) The wild-type (WT), *atg32Δ*, *slt2Δ*, and *hog1Δ* strains were cultured in YPL medium until the mid-log growth phase and then shifted to SD-N medium for 0, 2, or 4 hours. The phosphorylation status of Atg32 was observed by immunoblotting with anti-Atg32 and anti-Pgk1 (loading control) antibodies.

### **Supplementary Figure S10**

Wild-type cells expressing Cka1-GFP, Cka2-GFP, Ckb1-GFP, or Ckb2-GFP were cultured in YPD or YPL medium until the mid-log phase (A). Cells were cultured in YPL medium until the mid-log phase and then shifted to SD-N medium for 1 hour (B). The localization of GFP was visualized by fluorescence microscopy. DIC, differential interference contrast.

### **Supplementary Figure S11**

Wild-type cells expressing Cka1-GFP were cultured in YPL medium until the mid-log phase and then shifted to SD-N medium for 1 hour. Cells were labeled with 4',6-diamidino-2-phenylindole (DAPI, 2.5 μg/ml) that accumulates both on mitochondrial

DNA and nuclear DNA (A) or MitoTracker RedCMXRos (0.5  $\mu$ M) that stains mitochondria (B), and analyzed by fluorescence microscopy.

### **Supplementary Figure S12**

Wild-type cells expressing Ckb1-GFP were cultured in YPL medium until the mid-log phase and then shifted to SD-N medium for 1 hour. Cells were labeled with DAPI (2.5  $\mu$ g/ml) that accumulates both on mitochondrial DNA and nuclear DNA (A) or MitoTracker RedCMXRos (0.5  $\mu$ M) that stains mitochondria (B), and analyzed by fluorescence microscopy.

### **Supplementary References**

1. Kanki T, Wang K, Cao Y, Baba M, Klionsky DJ (2009) Atg32 is a mitochondrial protein that confers selectivity during mitophagy. *Dev Cell* **17**: 98-109
2. Aoki Y, Kanki T, Hirota Y, Kurihara Y, Saigusa T, Uchiumi T, Kang D (2011) Phosphorylation of Serine 114 on Atg32 mediates mitophagy. *Mol Biol Cell* **22**: 3206-3217
3. Robinson JS, Klionsky DJ, Banta LM, Emr SD (1988) Protein sorting in *Saccharomyces cerevisiae*: isolation of mutants defective in the delivery and processing of multiple vacuolar hydrolases. *Mol Cell Biol* **8**: 4936-4948
4. Kanki T, Klionsky DJ (2008) Mitophagy in yeast occurs through a selective mechanism. *J Biol Chem* **283**: 32386-32393
5. Shintani T, Huang WP, Stromhaug PE, Klionsky DJ (2002) Mechanism of cargo selection in the cytoplasm to vacuole targeting pathway. *Dev Cell* **3**: 825-837

## Supplementary Table S1: List of genes tested in the manuscript

### kinase/component of kinase (including putative kinase)

| gene         | systematic name |
|--------------|-----------------|
| <i>ADK1</i>  | YDR226W         |
| <i>ALK1</i>  | YGL021W         |
| <i>ALK2</i>  | YBL009W         |
| <i>ARK1</i>  | YNL020C         |
| <i>ATG1</i>  | YGL180W         |
| <i>BCK1</i>  | YJL095W         |
| <i>BUB1</i>  | YGR188C         |
| <i>BUD32</i> | YGR262C         |
| <i>CDC5</i>  | YMR001C         |
| <i>CHK1</i>  | YBR274W         |
| <i>CKA1</i>  | YIL035C         |
| <i>CKA2</i>  | YOR061W         |
| <i>CKB1</i>  | YGL019W         |
| <i>CKB2</i>  | YOR039W         |
| <i>CKI1</i>  | YLR133W         |
| <i>CLA4</i>  | YNL298W         |
| <i>CLA4</i>  | YNL298W         |
| <i>CMK1</i>  | YFR014C         |
| <i>CMK2</i>  | YOL016C         |
| <i>CTK1</i>  | YKL139W         |
| <i>CTK1</i>  | YKL139W         |
| <i>CTK2</i>  | YJL006C         |
| <i>CTK3</i>  | YML112W         |
| <i>DAK1</i>  | YML070W         |
| <i>DAK2</i>  | YFL053W         |
| <i>DBF20</i> | YPR111W         |
| <i>DUN1</i>  | YDL101C         |
| <i>EKI1</i>  | YDR147W         |
| <i>ELM1</i>  | YKL048C         |
| <i>FRK1</i>  | YPL141C         |
| <i>FUS3</i>  | YBL016W         |
| <i>GCN2</i>  | YDR283C         |
| <i>GIN4</i>  | YDR507C         |
| <i>GUT1</i>  | YHL032C         |
| <i>HAL5</i>  | YJL165C         |
| <i>HOG1</i>  | YLR113W         |

|              |         |
|--------------|---------|
| <i>HRK1</i>  | YOR267C |
| <i>HSL1</i>  | YKL101W |
| <i>IKS1</i>  | YJL057C |
| <i>IME2</i>  | YJL106W |
| <i>IRE1</i>  | YHR079C |
| <i>ISR1</i>  | YPR106W |
| <i>KCC4</i>  | CL024W  |
| <i>KDX1</i>  | YKL161C |
| <i>KIN1</i>  | YDR122W |
| <i>KIN2</i>  | YLR096W |
| <i>KIN3</i>  | YAR018C |
| <i>KIN4</i>  | YOR233W |
| <i>KKQ8</i>  | YKL168C |
| <i>KNS1</i>  | YLL019C |
| <i>KSP1</i>  | YHR082C |
| <i>LCB4</i>  | YOR171C |
| <i>MCK1</i>  | YNL307C |
| <i>MEK1</i>  | YOR351C |
| <i>MET14</i> | YKL001C |
| <i>MKK1</i>  | YOR231W |
| <i>MKK2</i>  | YPL140C |
| <i>MRK1</i>  | YDL079C |
| <i>NNK1</i>  | YKL171W |
| <i>NPR1</i>  | YNL183C |
| <i>PHO85</i> | YPL031C |
| <i>PKH1</i>  | YDR490C |
| <i>PKH2</i>  | YOL100W |
| <i>PKH3</i>  | YDR466W |
| <i>PKP1</i>  | YIL042C |
| <i>PKP2</i>  | YGL059W |
| <i>PPZ1</i>  | YML016C |
| <i>PRK1</i>  | YIL095W |
| <i>PRO1</i>  | YDR300C |
| <i>PRR1</i>  | YKL116C |
| <i>PRR2</i>  | YDL214C |
| <i>PSK1</i>  | YAL017W |
| <i>PSK2</i>  | YOL045W |
| <i>PTK1</i>  | YKL198C |
| <i>PTK2</i>  | YJR059W |
| <i>RCK1</i>  | YGL158W |

|              |         |
|--------------|---------|
| <i>RCK2</i>  | YLR248W |
| <i>RIM15</i> | YFL033C |
| <i>RLM1</i>  | YPL089C |
| <i>RTK1</i>  | YDL025C |
| <i>SAT4</i>  | YCR008W |
| <i>SCH9</i>  | YHR205W |
| <i>SCY1</i>  | YGL083W |
| <i>SIP1</i>  | YDR422C |
| <i>SIP2</i>  | YGL208W |
| <i>SKM1</i>  | YOL113W |
| <i>SKS1</i>  | YPL026C |
| <i>SKY1</i>  | YMR216C |
| <i>SLT2</i>  | YHR030C |
| <i>SMK1</i>  | YPR054W |
| <i>SNF1</i>  | YDR477W |
| <i>SPS1</i>  | YDR523C |
| <i>SSK2</i>  | YNR031C |
| <i>SSK22</i> | YCR073C |
| <i>STE11</i> | YLR362W |
| <i>STE7</i>  | YDL159W |
| <i>SWE1</i>  | YJL187C |
| <i>TCO89</i> | YPL180W |
| <i>TDA1</i>  | YMR291W |
| <i>TEL1</i>  | YBL088C |
| <i>THR1</i>  | YHR025W |
| <i>TOR1</i>  | YJR066W |
| <i>TOS3</i>  | YGL179C |
| <i>TPK1</i>  | YJL164C |
| <i>TPK2</i>  | YPL203W |
| <i>TPK3</i>  | YKL166C |
| <i>URK1</i>  | YNR012W |
| <i>VHS1</i>  | YDR247W |
| <i>VIP1</i>  | YLR410W |
| <i>VPS15</i> | YBR097W |
| <i>YAK1</i>  | YJL141C |
| <i>YCK1</i>  | YHR135C |
| <i>YCK2</i>  | YNL154C |
| <i>YGK3</i>  | YOL128C |
| <i>YPK1</i>  | YKL126W |
| <i>YPK2</i>  | YMR104C |

*YPK3* YBR028C

*YPL150W* YPL150W

**kinase related protein**

gene systematic name

*CLB1* YGR108W

*CLB2* YPR119W

*CLB3* YDL155W

*CLB4* YLR210W

*CLB5* YPR120C

*CLB6* YGR109C

*CLN1* YMR199W

*CLN2* YPL256C

*CLN3* YAL040C

*PCL1* YNL289W

*PCL1* YNL289W

*PCL10* YGL134W

*PCL7* YIL050W

*PCL8* YPL219W

*PCL9* YDL179W

*PHO80* YOL001W

*SAK1* YER129W

*SSN8* YNL025C

*STE20* YHL007C

*YCK3* YER123W

*YPL109C* YPL109C



**Supplementary Table S2: Yeast strains used in this study**

| <b>Strain</b>           | <b>Genotype</b>                                                                                                                           | <b>Source</b> |
|-------------------------|-------------------------------------------------------------------------------------------------------------------------------------------|---------------|
| <b>SEY6210<br/>(WT)</b> | MAT $\alpha$ <i>his3-<math>\Delta</math>200 leu2-3,112 lys2-801<br/>trp1-<math>\Delta</math>901 ura3-52 suc2-<math>\Delta</math>9 GAL</i> | [3]           |
| <b>TKYM22</b>           | SEY6210 <i>OM45-GFP::TRP1</i>                                                                                                             | [4]           |
| <b>TKYM67</b>           | SEY6210 <i>PEX14-GFP::KanMX6</i>                                                                                                          | [4]           |
| <b>TKYM72</b>           | SEY6210 <i>atg1<math>\Delta</math>::HIS5 S.p.,<br/>PEX14-GFP::KanMX6</i>                                                                  | [4]           |
| <b>TKYM140</b>          | SEY6210 <i>atg32<math>\Delta</math>::LEU2,<br/>OM45-GFP::TRP1</i>                                                                         | [2]           |
| <b>TKYM165</b>          | SEY6210 <i>atg32<math>\Delta</math>::HIS5 S.p.</i>                                                                                        | [2]           |
| <b>TKYM222</b>          | SEY6210 <i>ckb1<math>\Delta</math>::HIS5 S.p.</i>                                                                                         | this study    |
| <b>TKYM224</b>          | SEY6210 <i>ckb2<math>\Delta</math>::HIS5 S.p.</i>                                                                                         | this study    |
| <b>TKYM230</b>          | SEY6210 <i>cka1<math>\Delta</math>::KanMX6</i>                                                                                            | this study    |
| <b>TKYM231</b>          | SEY6210 <i>cka2<math>\Delta</math>::KanMX6</i>                                                                                            | this study    |
| <b>TKYM236</b>          | SEY6210 <i>pho8<math>\Delta</math>::HIS5 S.p., pho13<math>\Delta</math>::LEU2</i>                                                         | [2]           |
| <b>TKYM237</b>          | SEY6210 <i>pho8<math>\Delta</math>60::HIS5 S.p.,<br/>pho13<math>\Delta</math>::LEU2, cka1<math>\Delta</math>::KanMX6</i>                  | this study    |

|                |                                                                                                                    |            |
|----------------|--------------------------------------------------------------------------------------------------------------------|------------|
| <b>TKYM238</b> | SEY6210 <i>pho8Δ60::HIS5 S.p.</i> ,<br><i>pho13Δ::LEU2, cka2Δ::KanMX6</i>                                          | this study |
| <b>TKYM250</b> | SEY6210 <i>hog1Δ::HIS5 S.p.</i> ,<br><i>OM45-GFP::TRP1</i>                                                         | [2]        |
| <b>TKYM256</b> | SEY6210 <i>pho8Δ60::HIS5 S.p.</i> ,<br><i>pho13Δ::LEU2, atg1Δ::URA3</i>                                            | [2]        |
| <b>TKYM261</b> | SEY6210 <i>pho8Δ60::HIS5 S.p.</i> ,<br><i>pho13Δ::LEU2, cka1Δ::TRP1</i><br><i>cka2Δ::KanMX6 [pRS416-CKA2D225N]</i> | this study |
| <b>TKYM269</b> | SEY6210 <i>cka1Δ::TRP1 cka2Δ::KanMX6</i><br><i>[pRS416-CKA2WT]</i>                                                 | this study |
| <b>TKYM271</b> | SEY6210 <i>cka1Δ::TRP1 cka2Δ::KanMX6</i><br><i>[pRS416-CKA2D225N]</i>                                              | this study |
| <b>TKYM276</b> | SEY6210 <i>cka1Δ::TRP1 cka2Δ::KanMX6</i><br><i>OM45-GFP::HIS3MX6 [pRS416-CKA2WT]</i>                               | this study |
| <b>TKYM277</b> | SEY6210 <i>cka1Δ::TRP1 cka2Δ::KanMX6</i><br><i>OM45-GFP::HIS3MX6</i><br><i>[pRS416-CKA2D225N]</i>                  | this study |
| <b>TKYM314</b> | SEY6210 <i>OM45-GFP::TRP1</i><br><i>Slt2Δ::KanMX6</i>                                                              | this study |
| <b>TKYM315</b> | SEY6210 <i>CKA1-GFP::TRP1</i>                                                                                      | this study |
| <b>TKYM316</b> | SEY6210 <i>CKA2-GFP::TRP1</i>                                                                                      | this study |
| <b>TKYM317</b> | SEY6210 <i>CKb1-GFP::TRP1</i>                                                                                      | this study |
| <b>TKYM318</b> | SEY6210 <i>CKb2-GFP::TRP1</i>                                                                                      | this study |

---

|                |                                                                      |            |
|----------------|----------------------------------------------------------------------|------------|
| <b>TKYM333</b> | SEY6210 <i>cka1Δ::KanMX6</i><br><i>OM45-GFP::TRP1</i>                | this study |
| <b>TKYM334</b> | SEY6210 <i>cka2Δ::KanMX6</i><br><i>OM45-GFP::TRP1</i>                | this study |
| <b>TKYM335</b> | SEY6210 <i>ckb1Δ::HIS5 S.p.</i><br><i>OM45-GFP::TRP1</i>             | this study |
| <b>TKYM336</b> | SEY6210 <i>ckb2Δ::HIS5 S.p.</i><br><i>OM45-GFP::TRP1</i>             | this study |
| <b>TKYM342</b> | SEY6210 <i>ckb1Δ::URA3 ckb2Δ::HIS5 S.p.</i>                          | this study |
| <b>TKYM347</b> | SEY6210 <i>ckb1Δ::URA3 ckb2Δ::HIS5 S.p.</i><br><i>OM45-GFP::TRP1</i> | this study |
| <b>TKYM370</b> | SEY6210 <i>cka1Δ::HIS5 S.p. cka2Δ::URA3</i><br>[pRS405-CKA2D225N]    | this study |
| <b>WHY1</b>    | SEY6210 <i>atg1Δ:: HIS5 S.p.</i>                                     | [5]        |

---

Figure S1-1

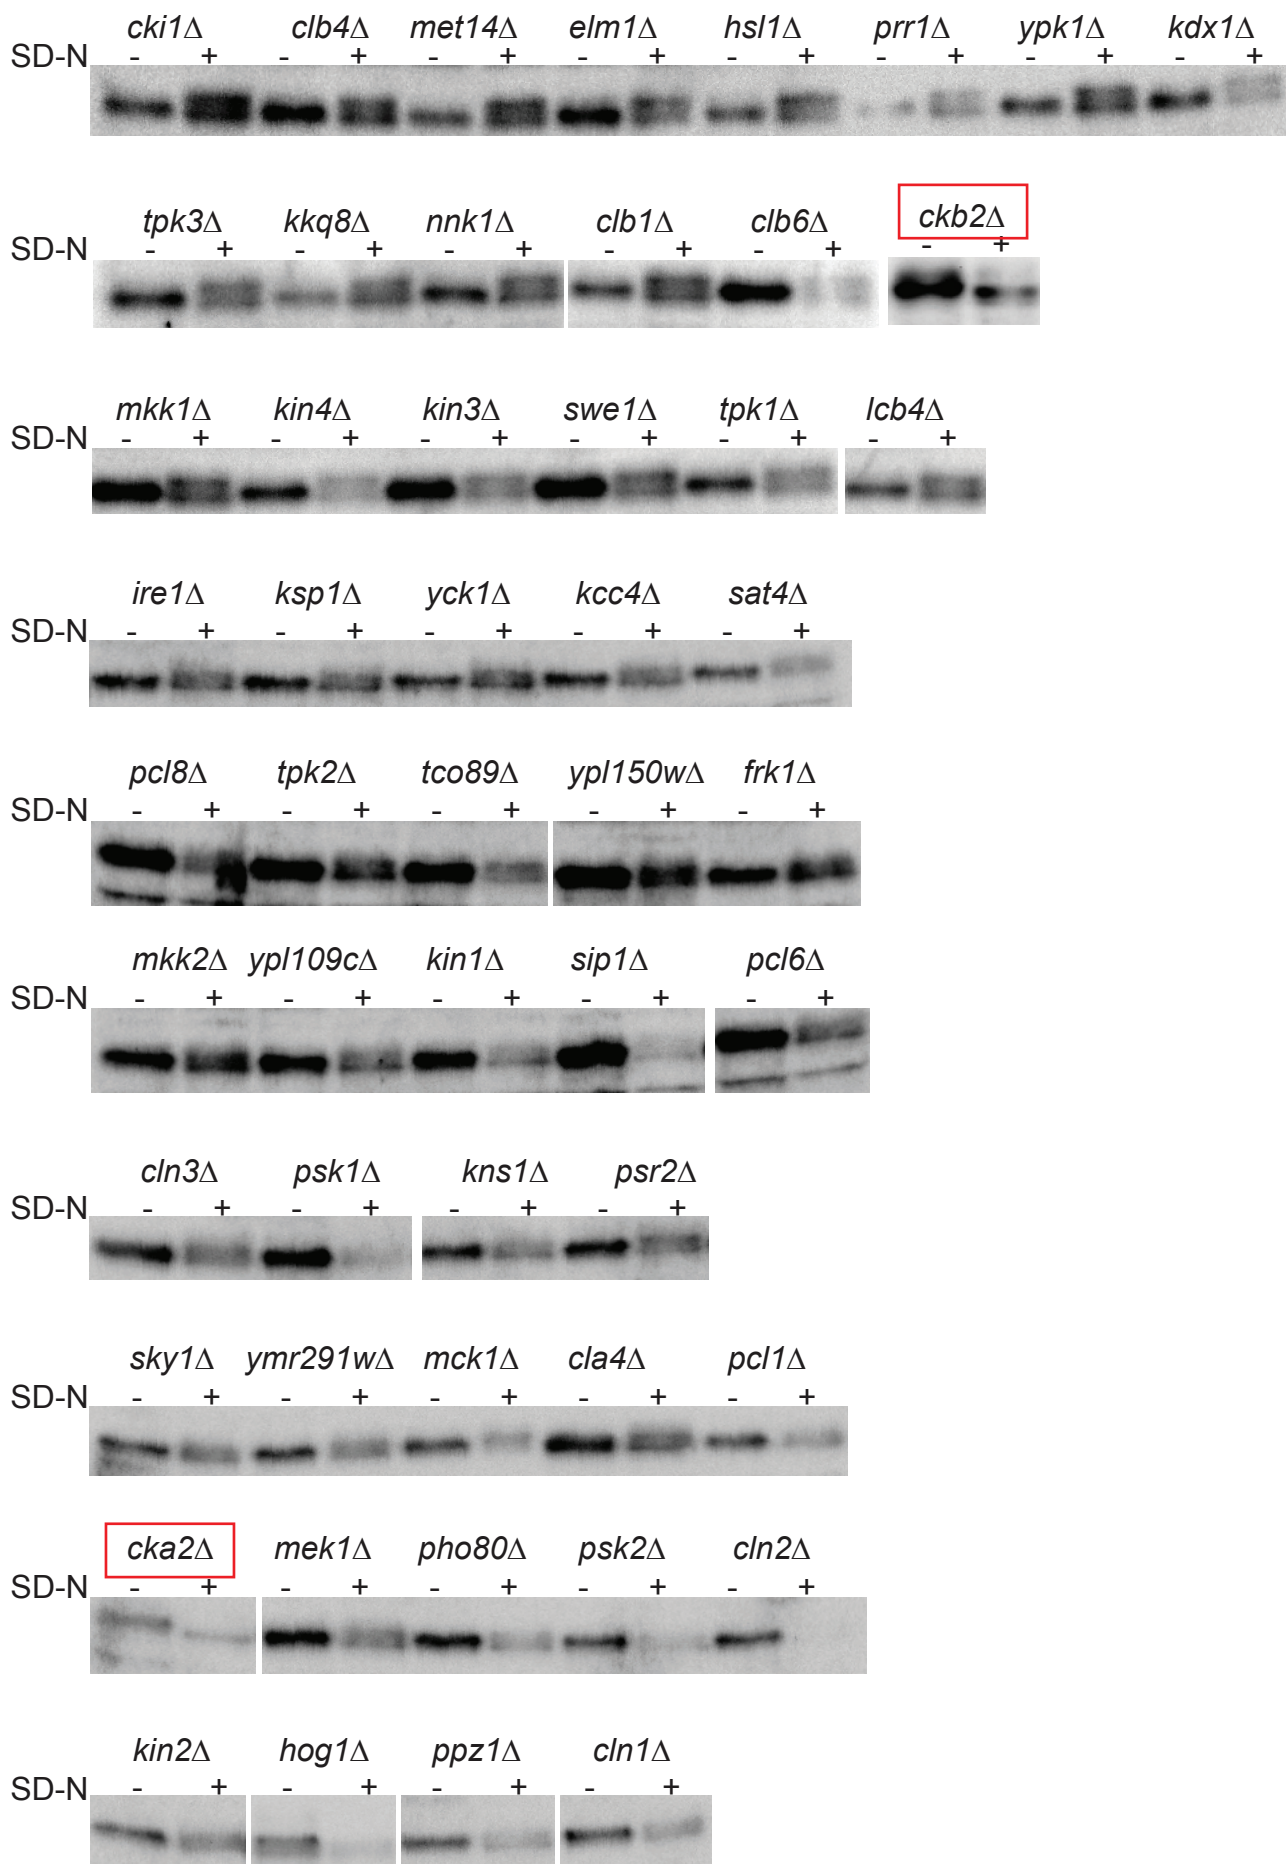

Figure S1-2

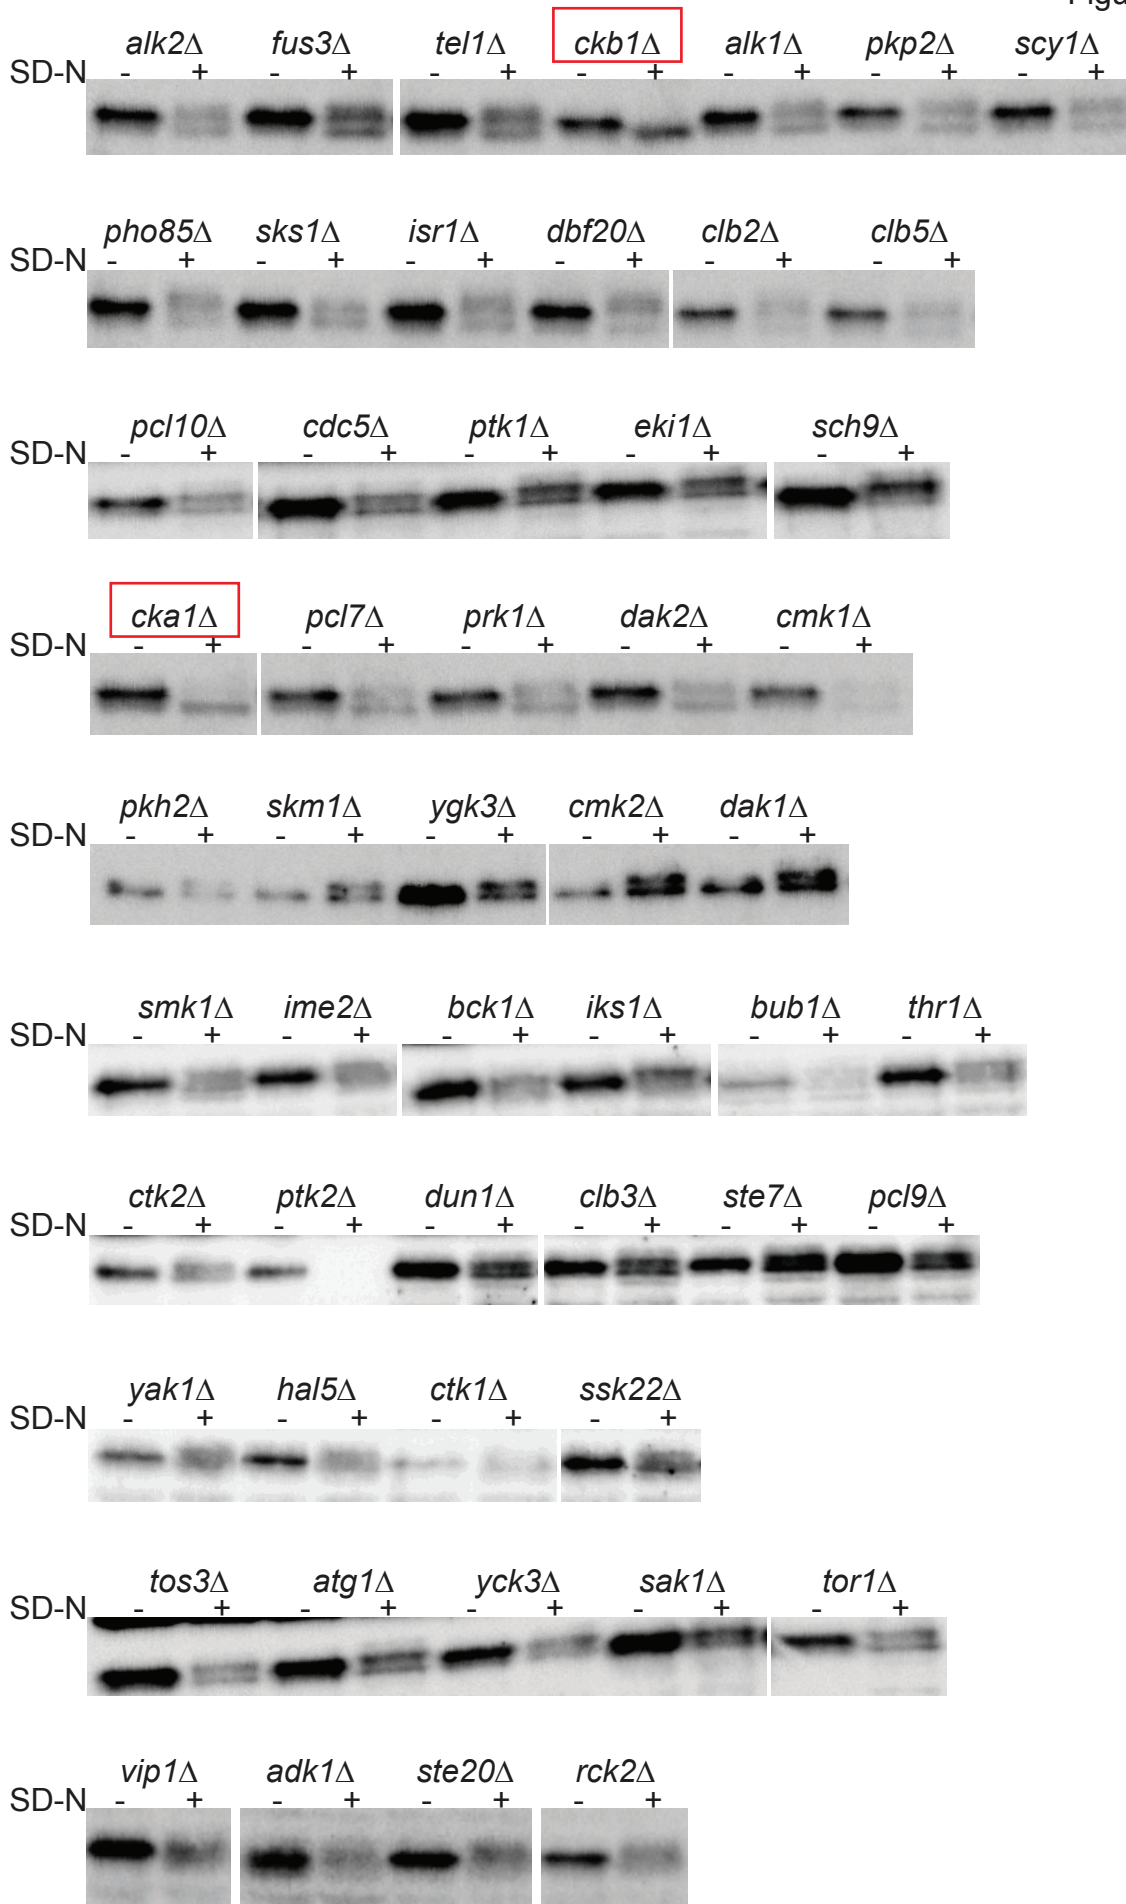

Figure S1-3

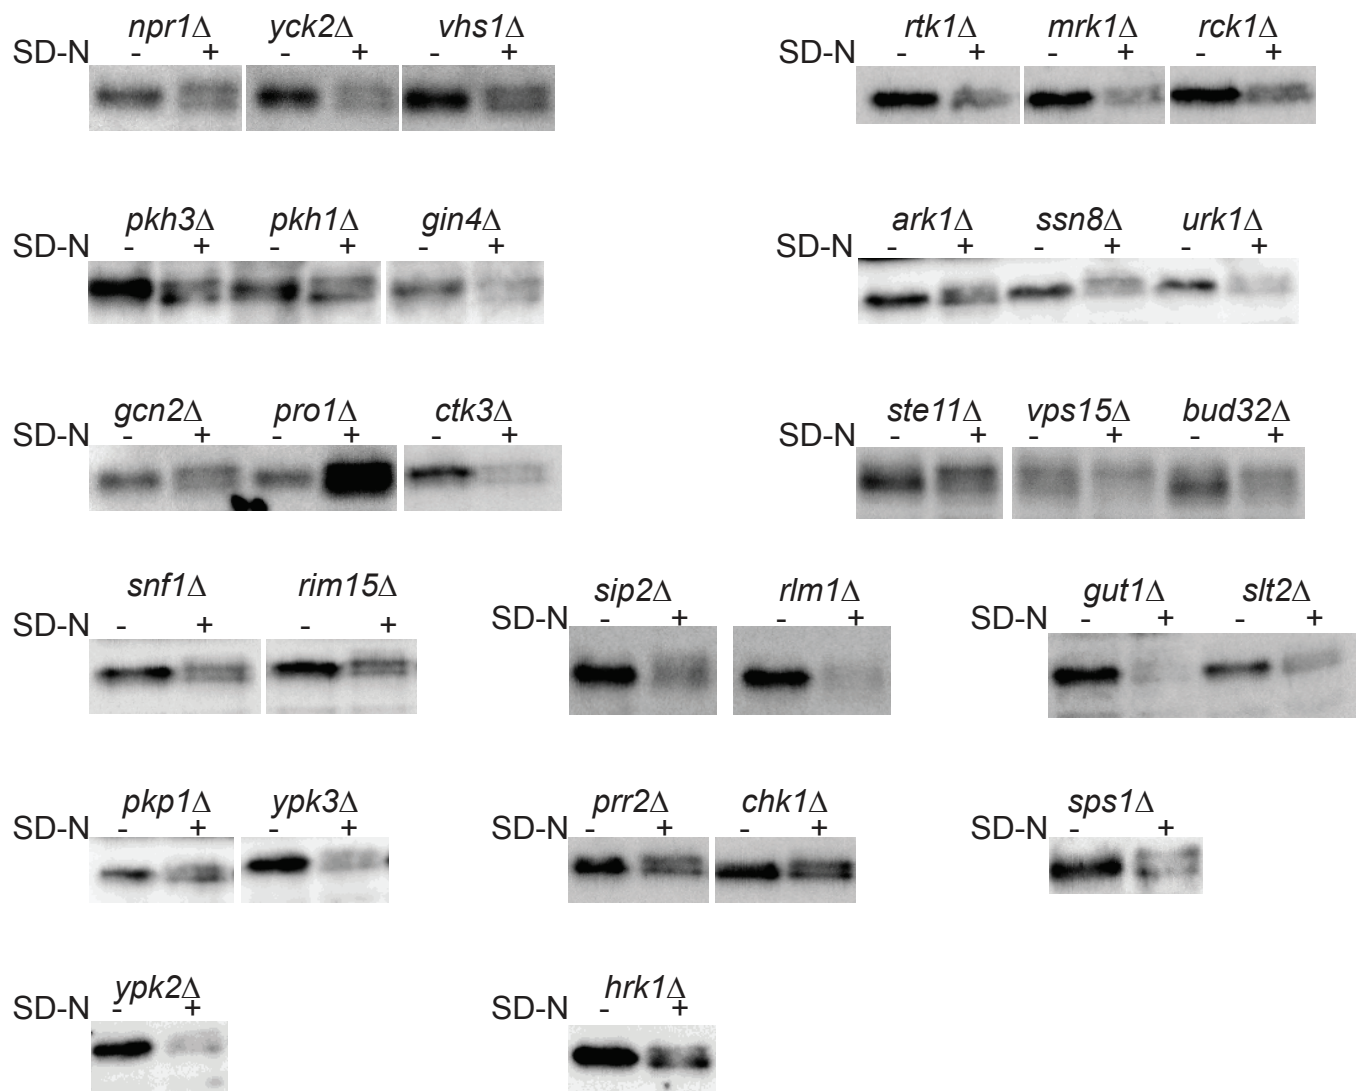

Figure S1-4

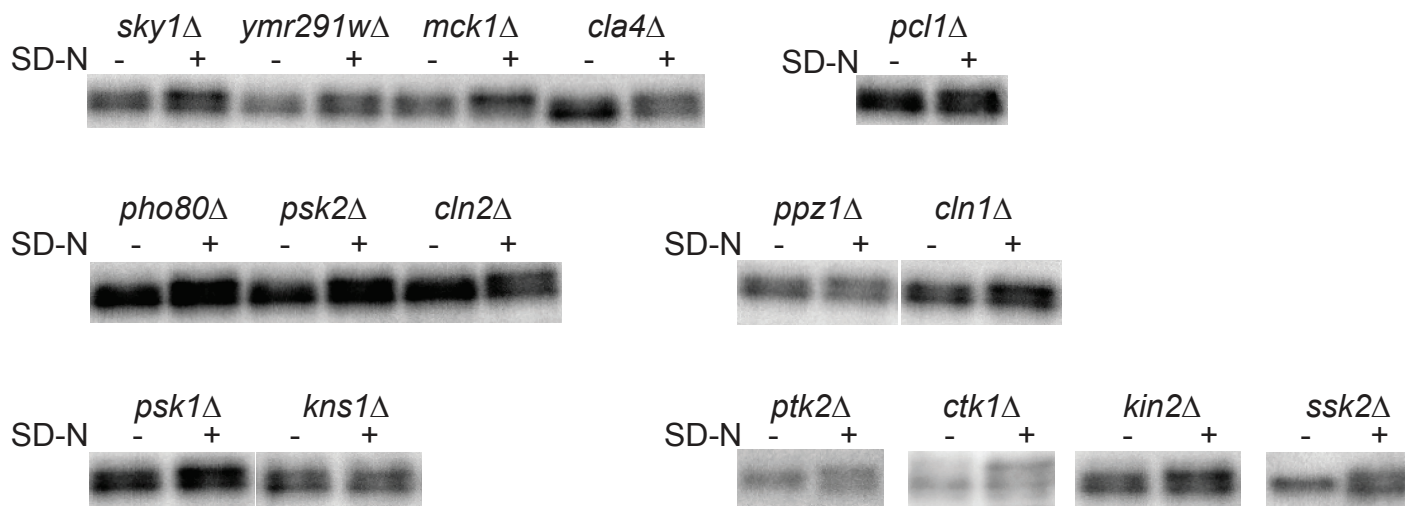



A

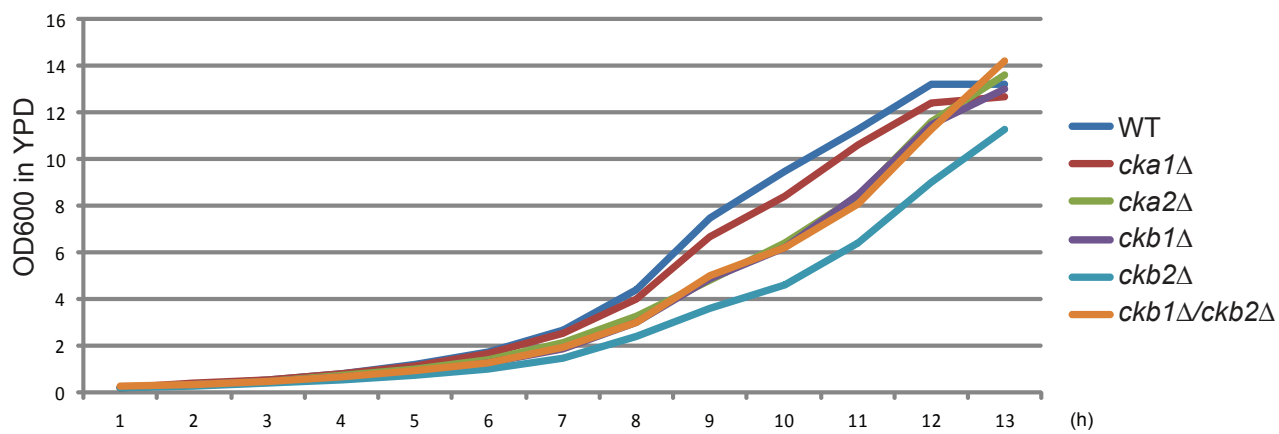

B

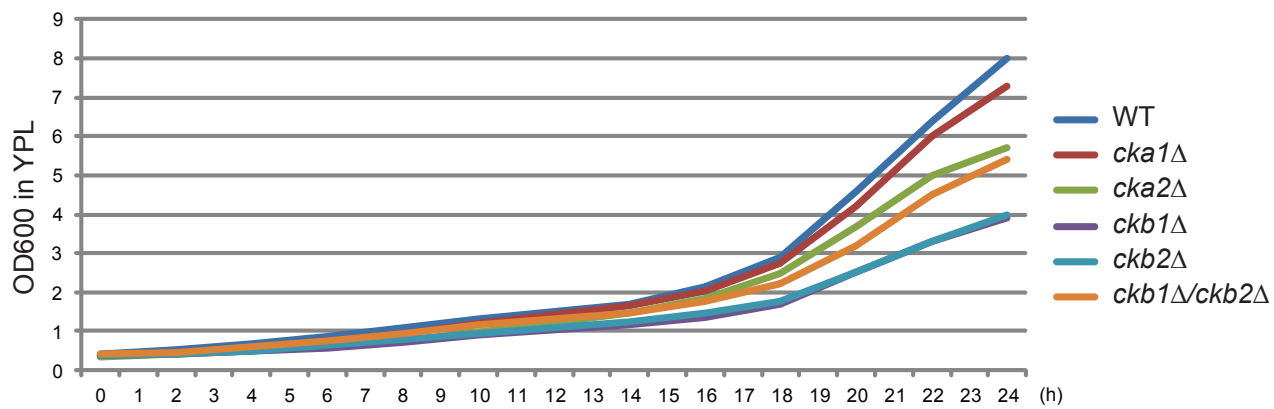



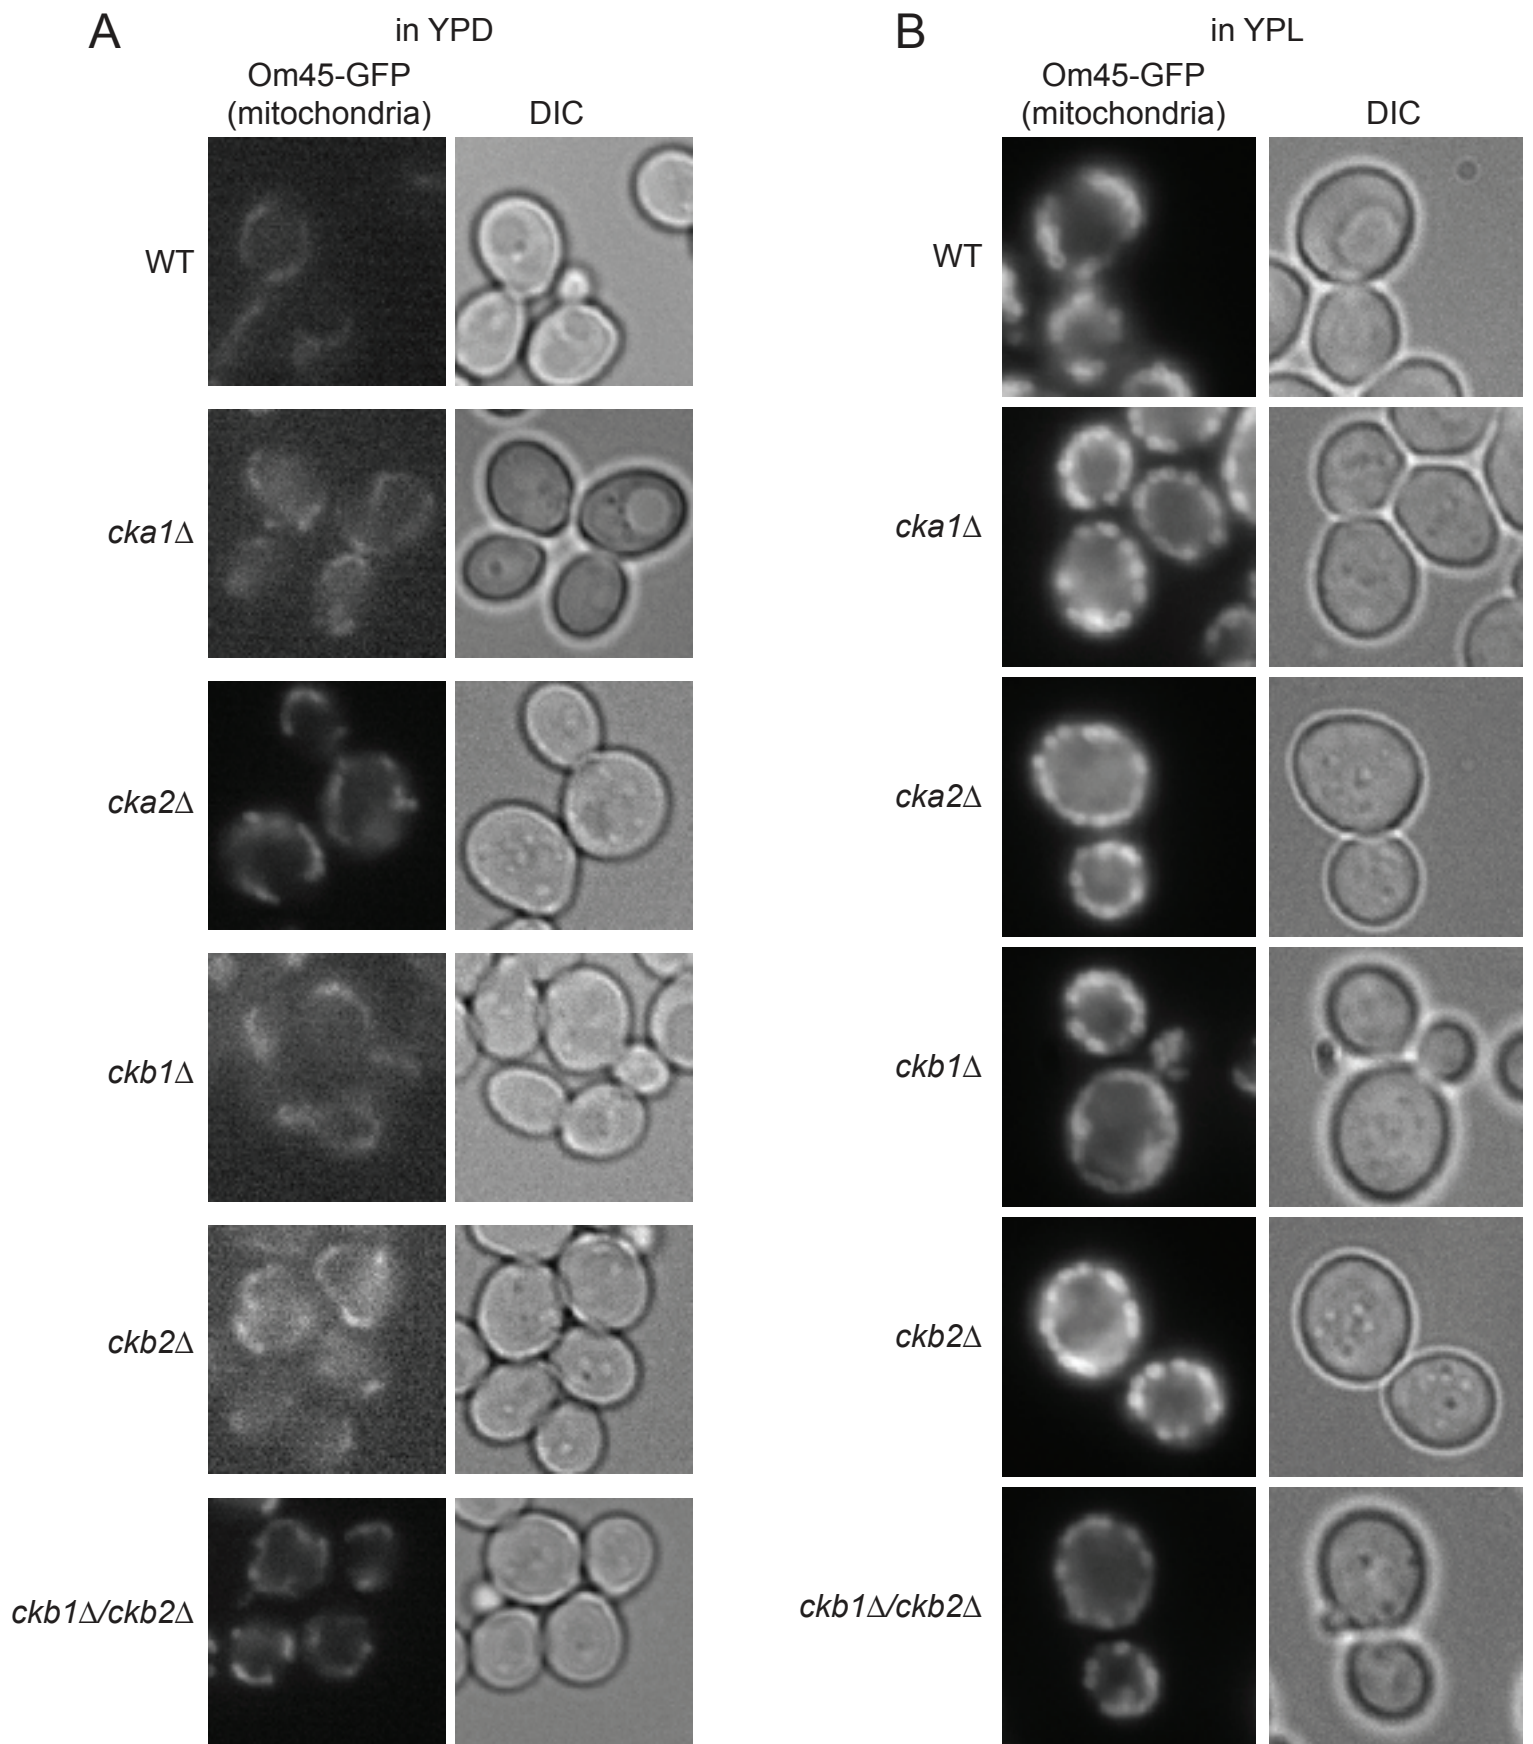

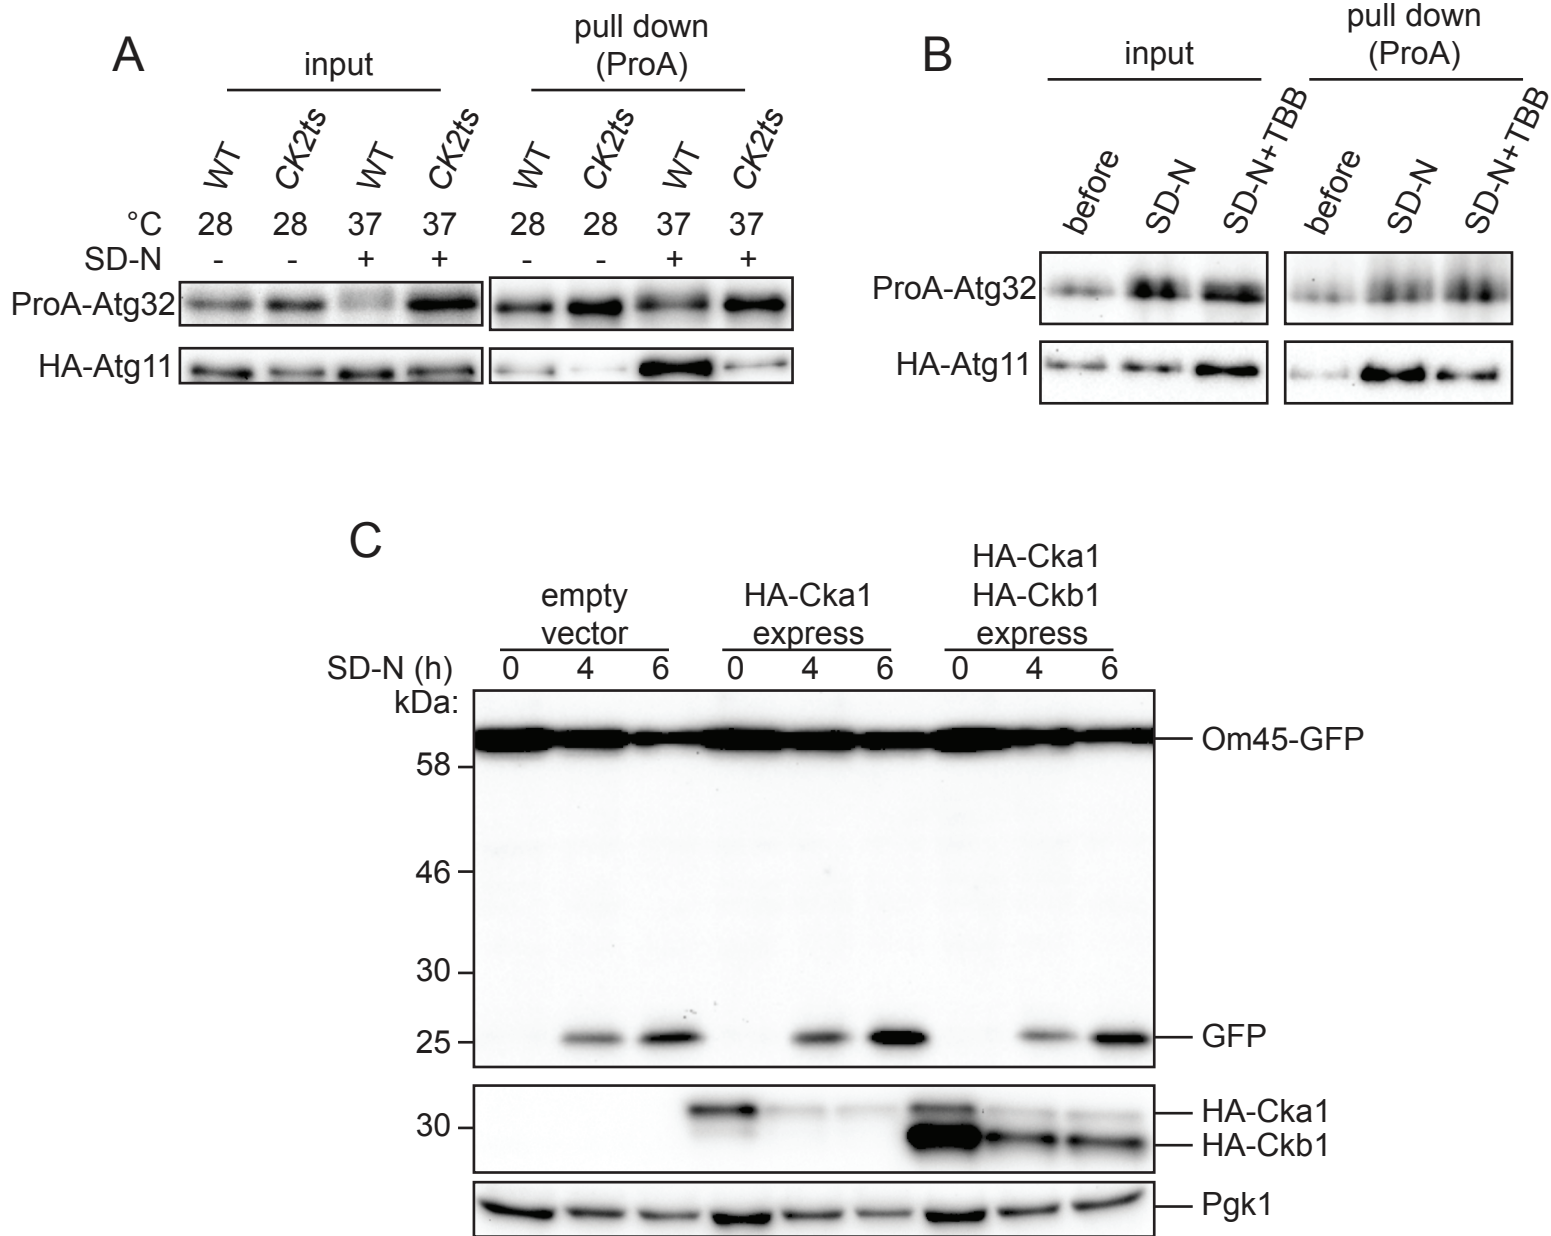

A

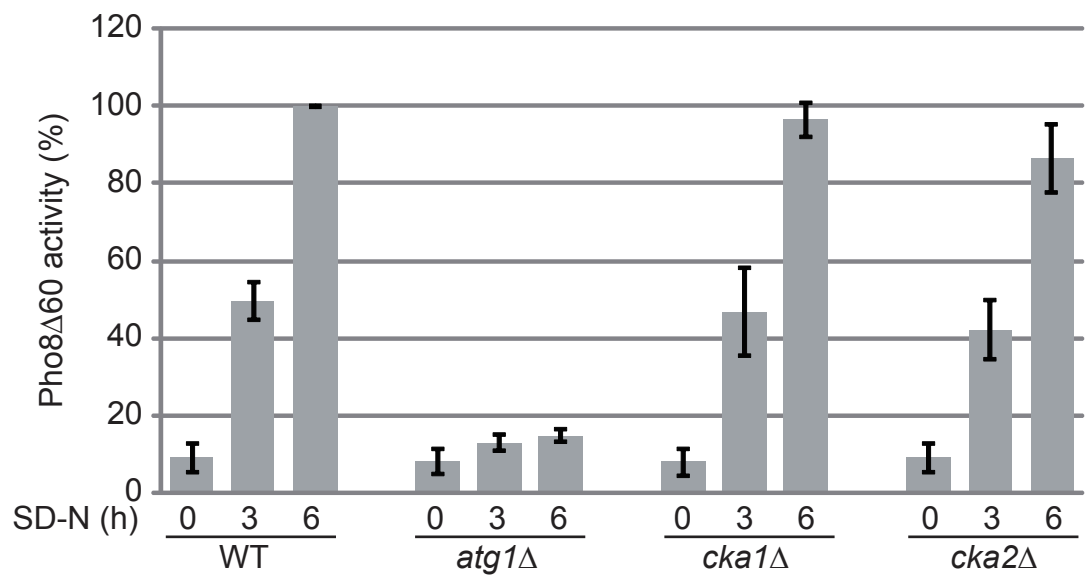

B

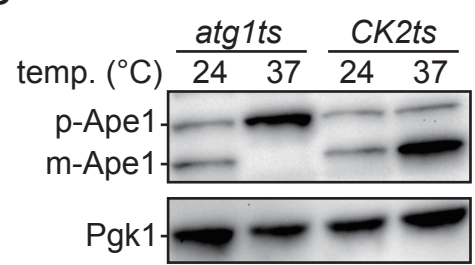

C

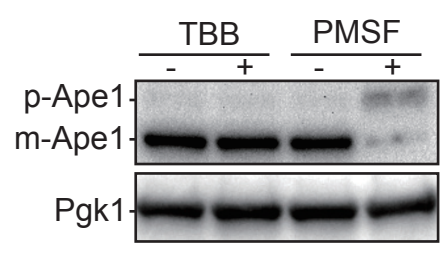

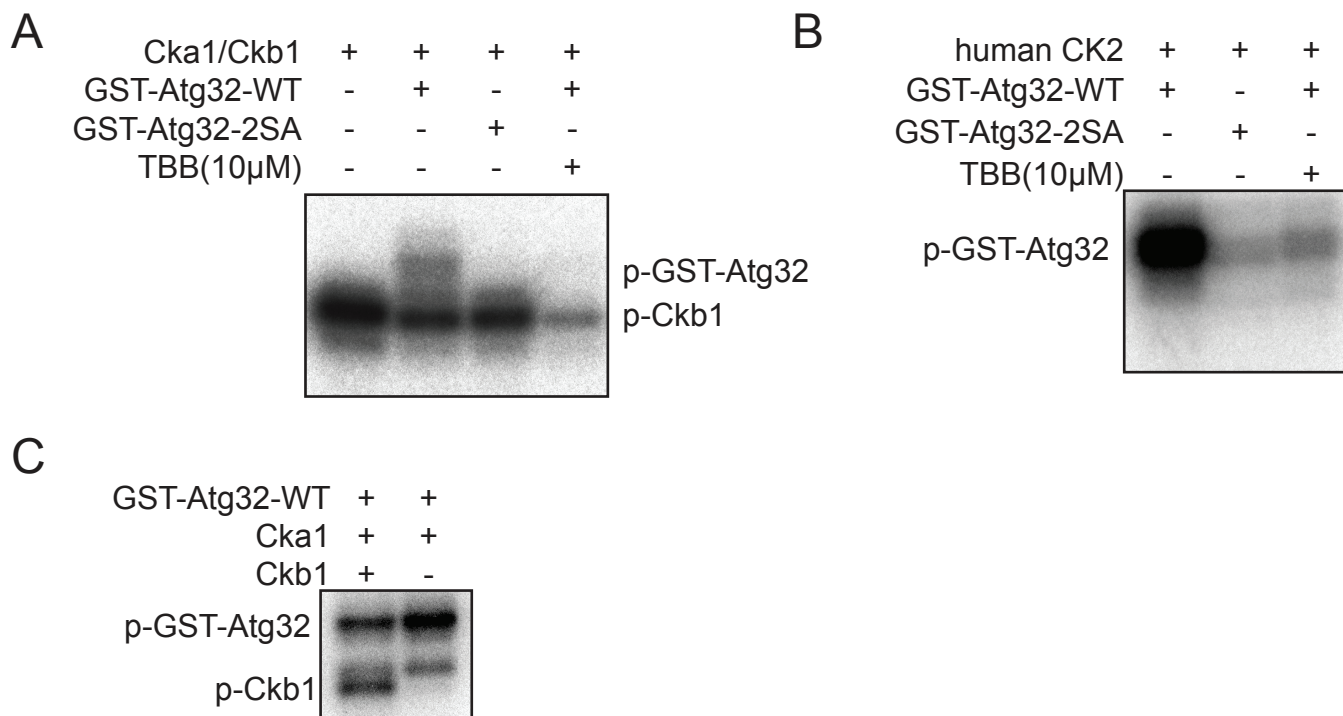

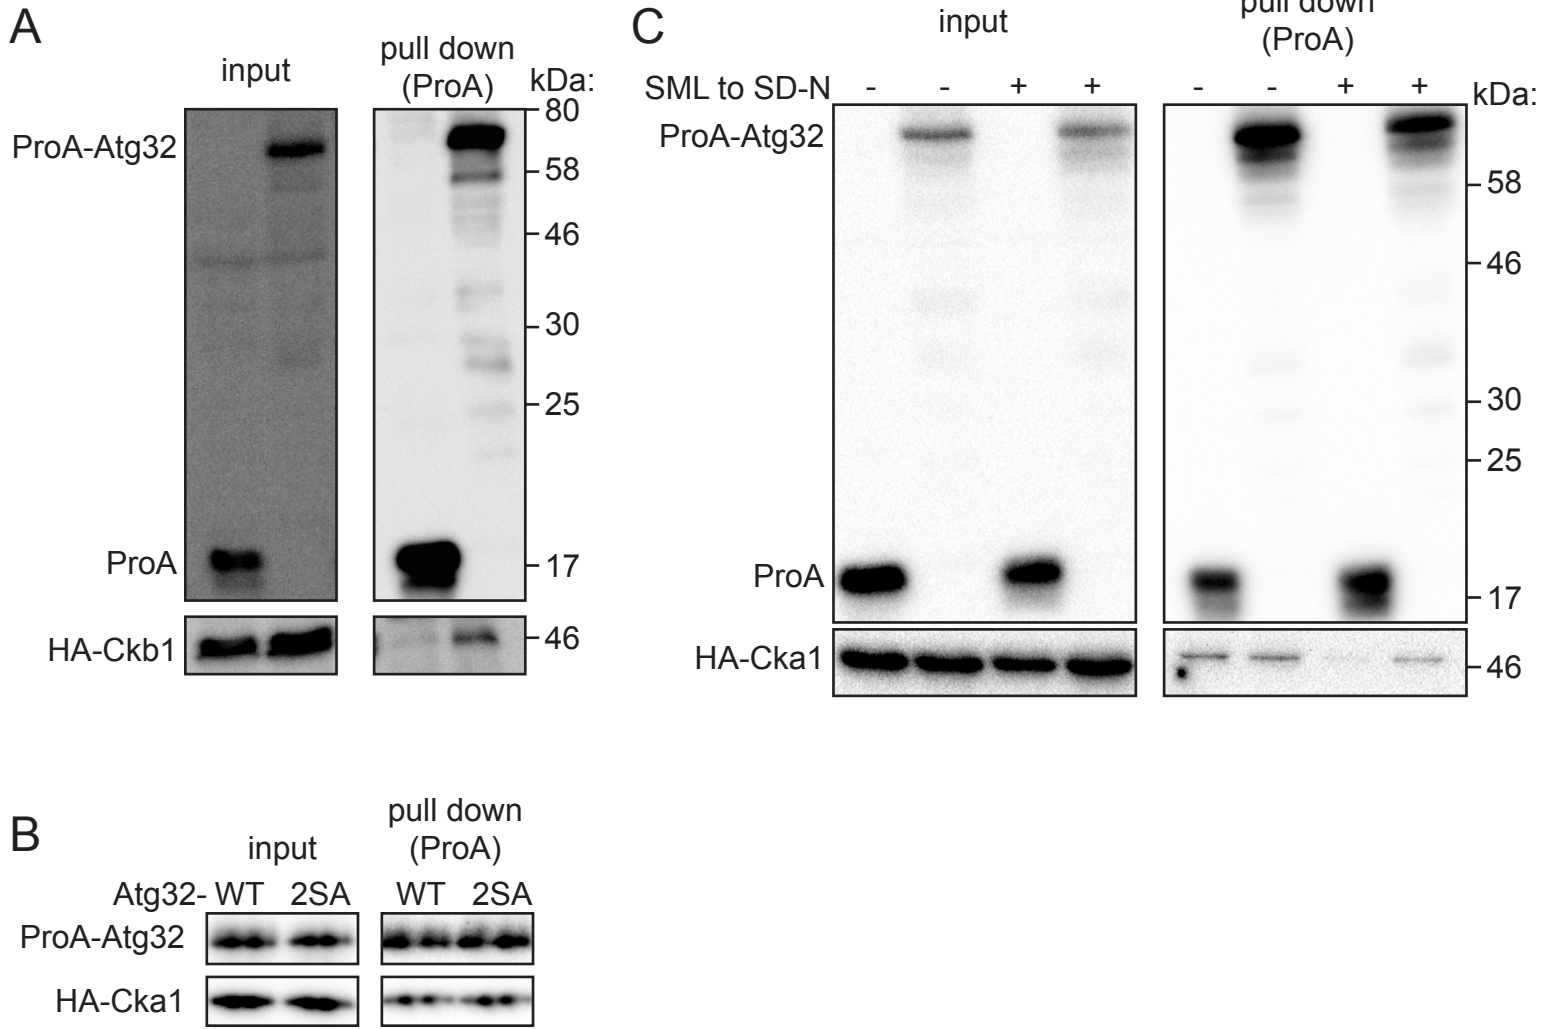

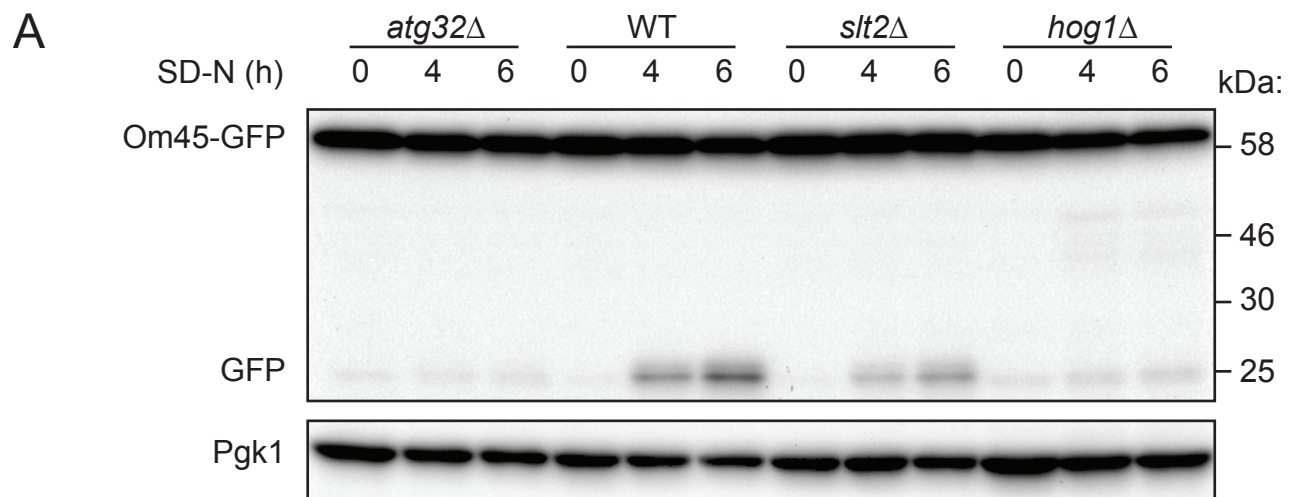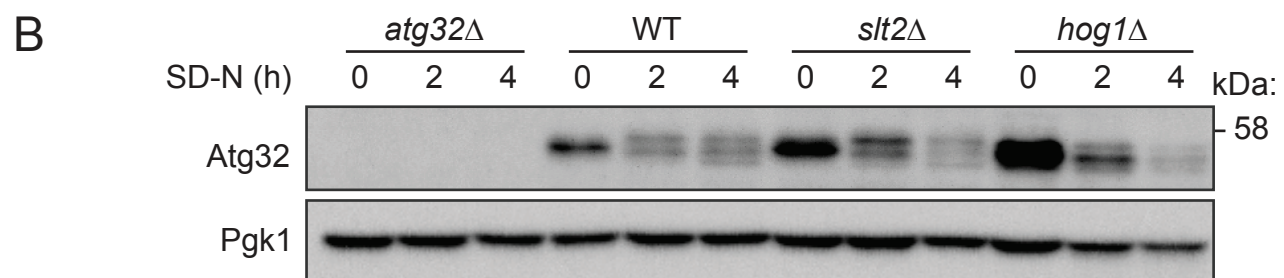



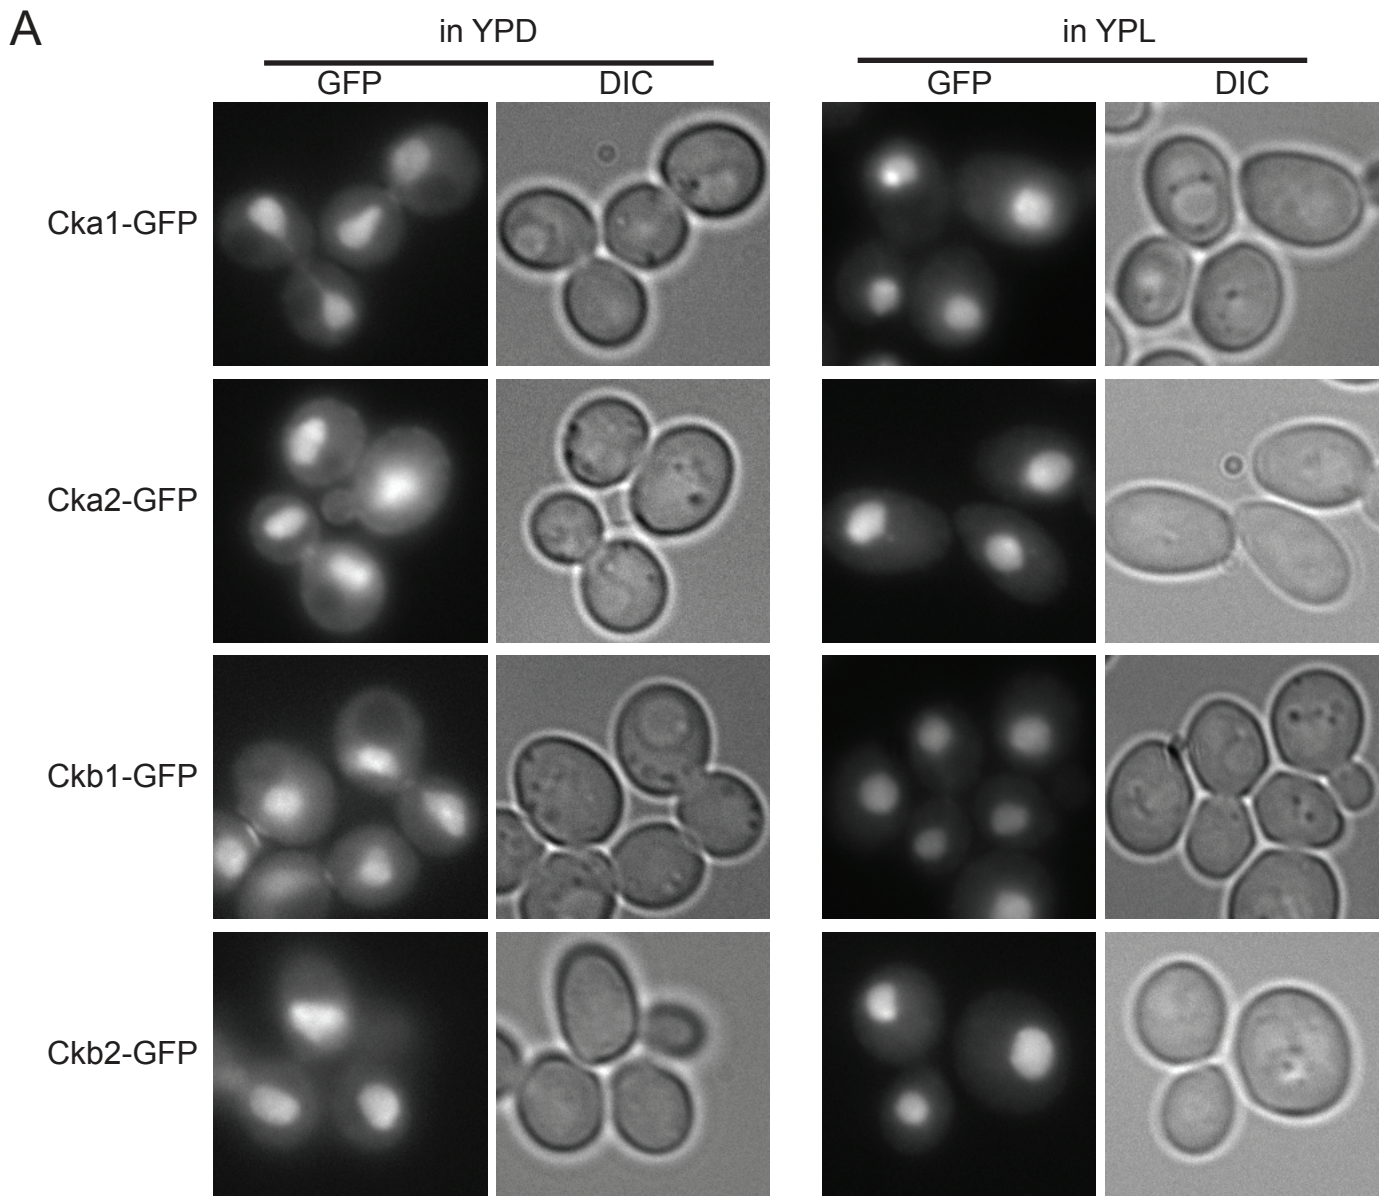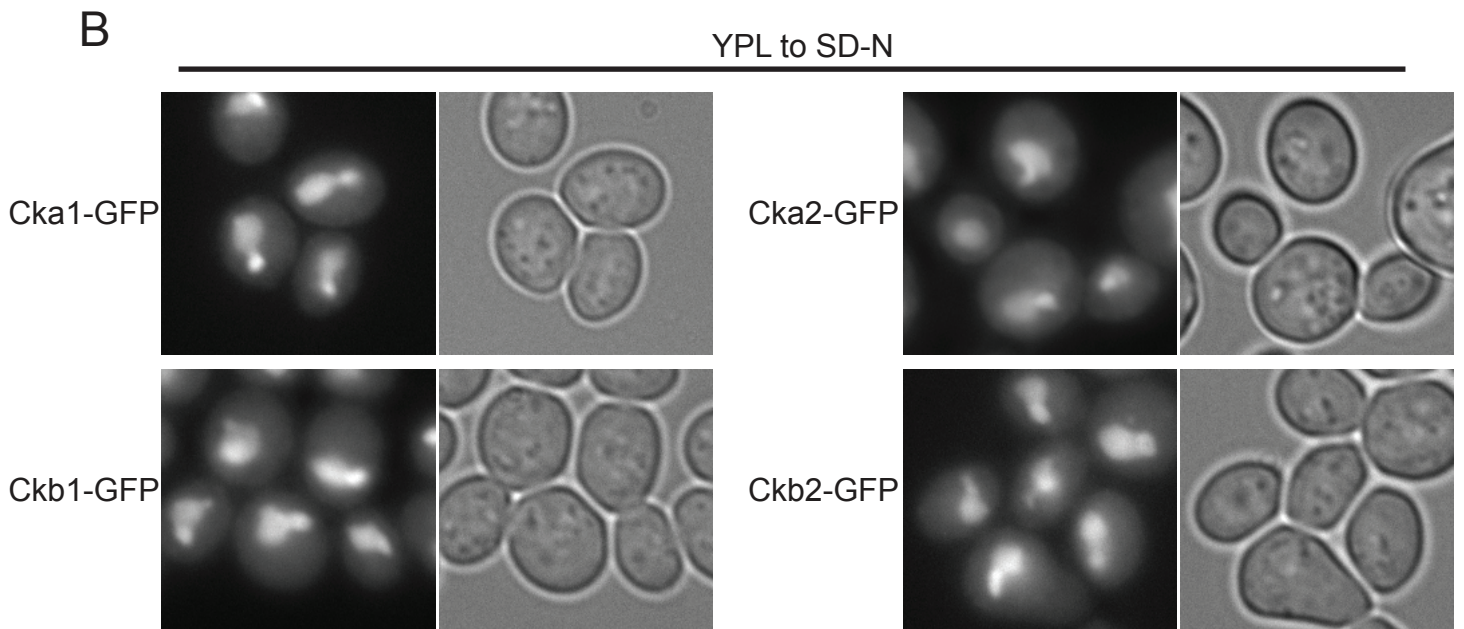

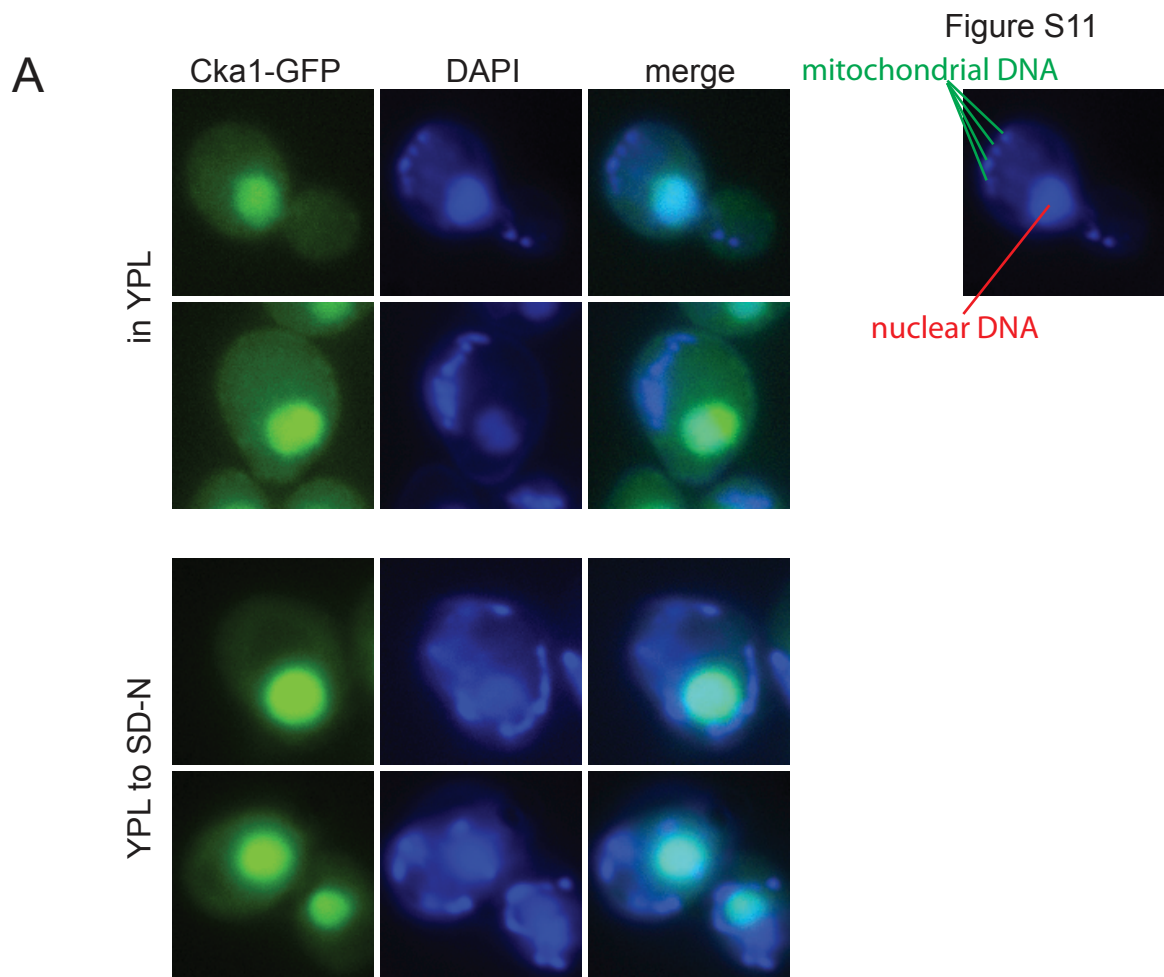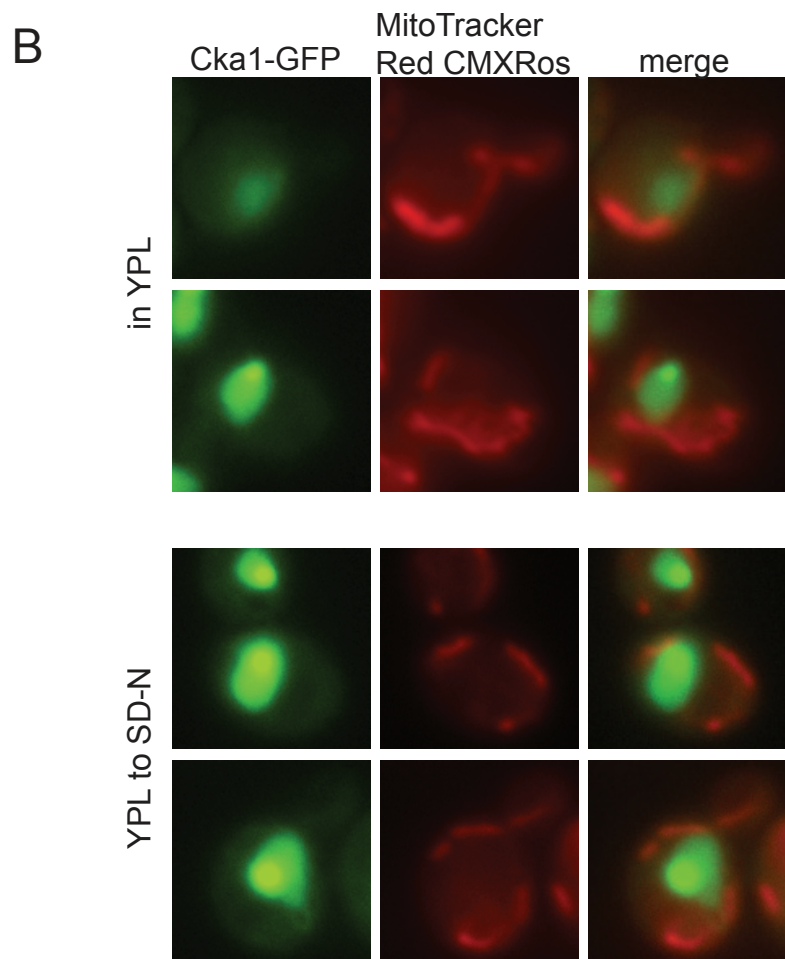



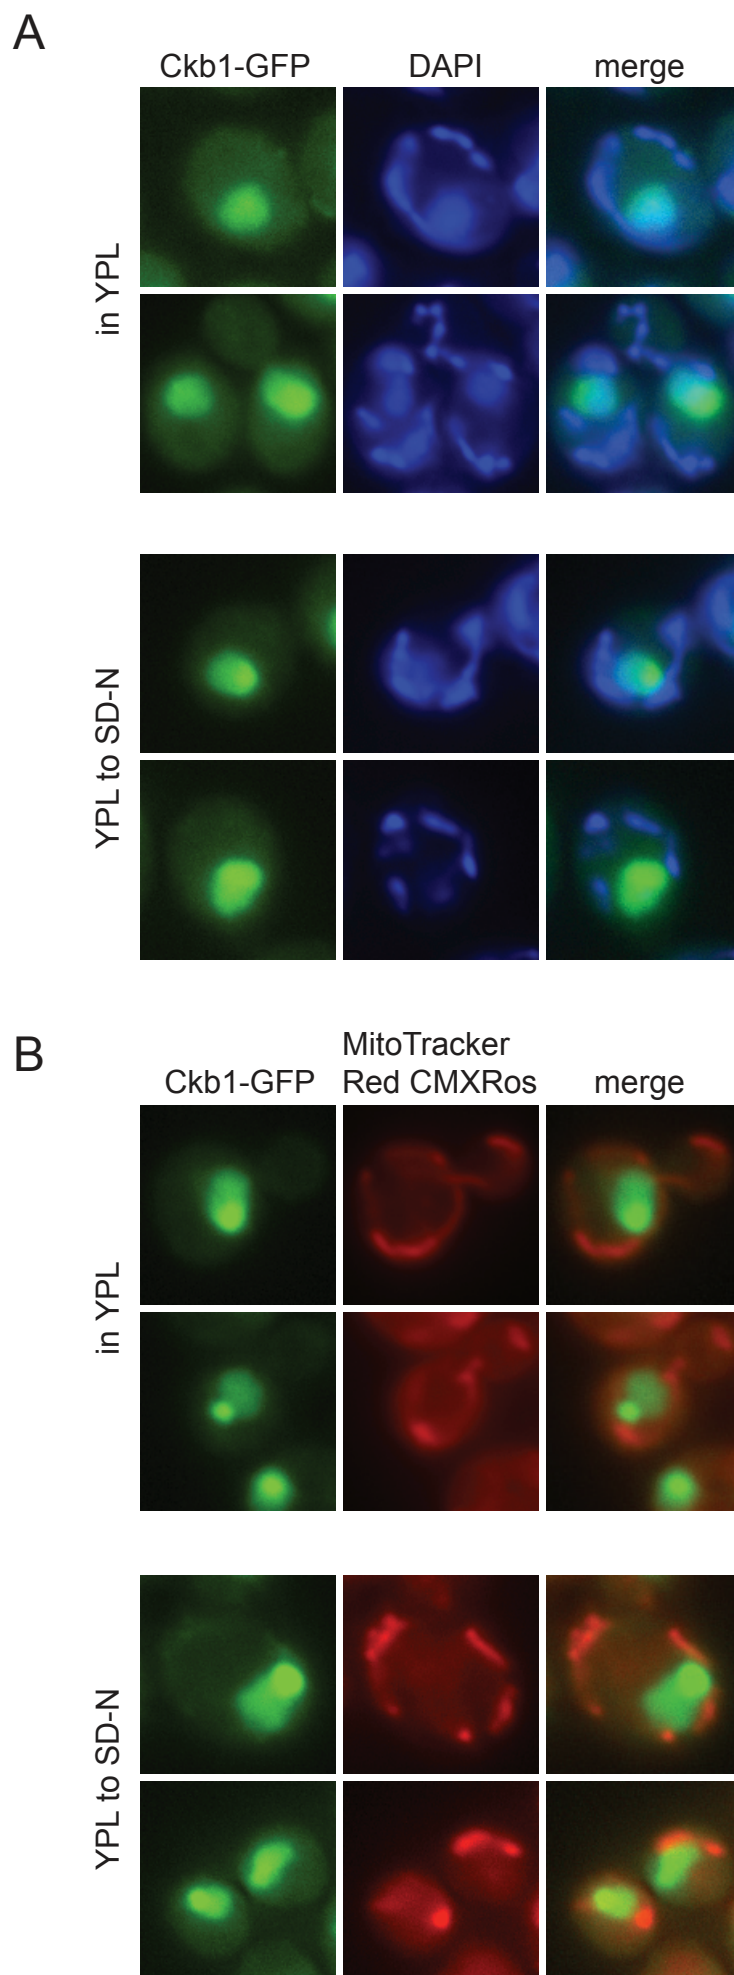

Supplement: embor2013114s1.pdf [file embor2013114s1.pdf]
