# Supplementary material
Source: PubMed Central journal article supplement (PMC3790056)

Key blots used in figure 1

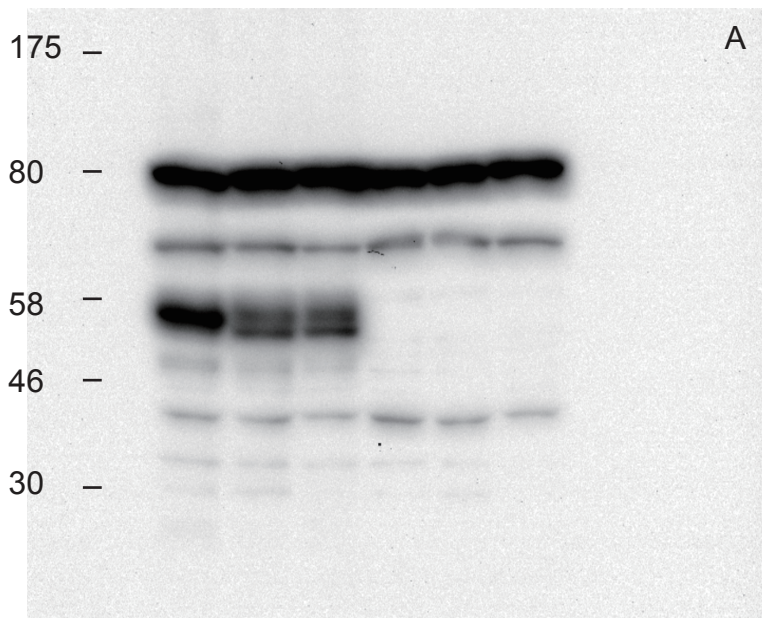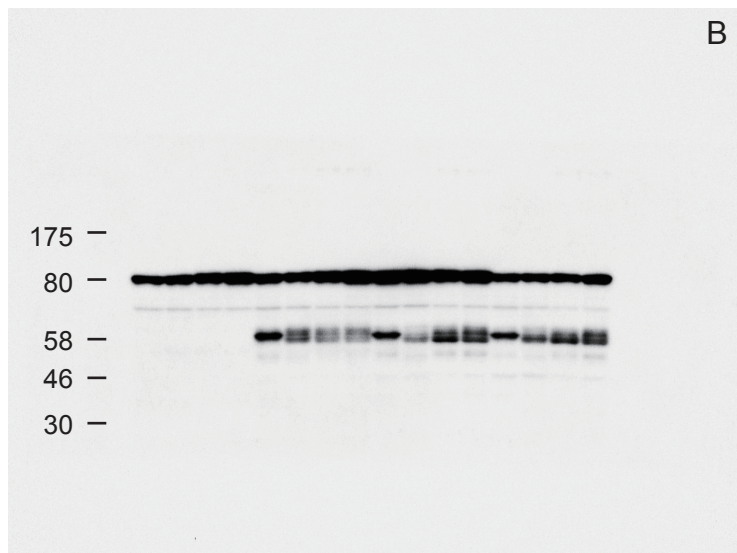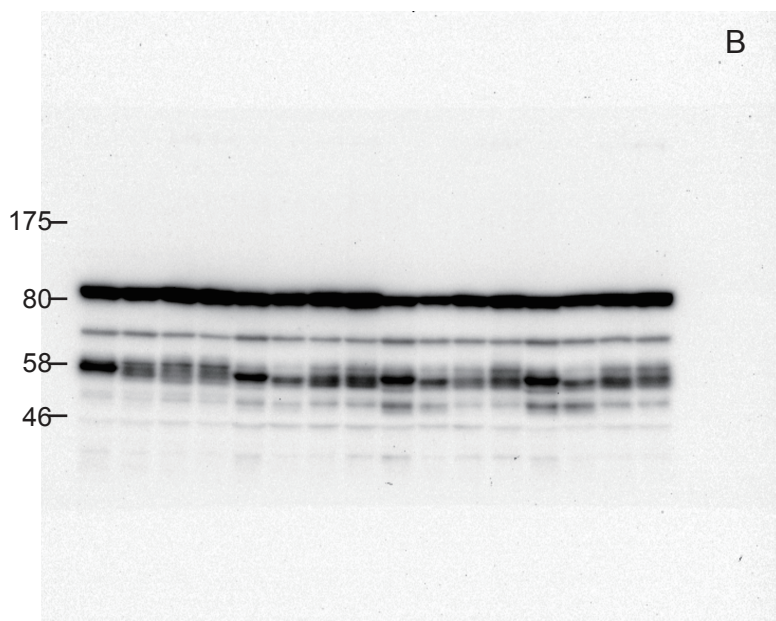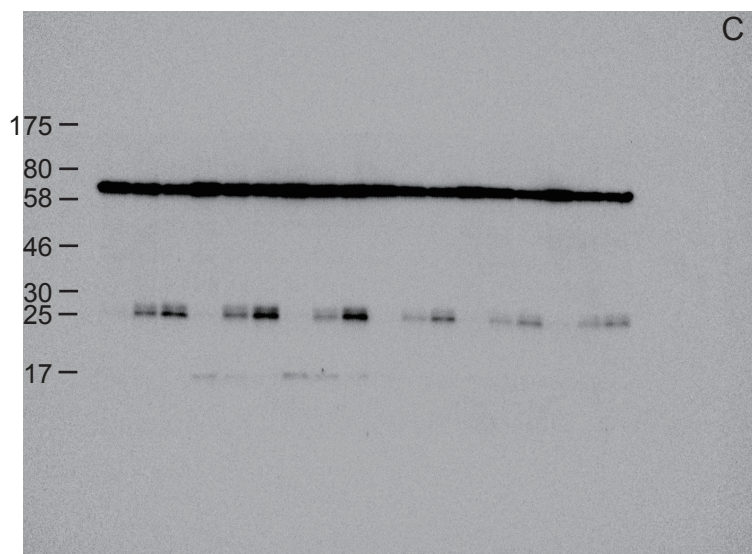

Supplement: embor2013114df1.pdf [file embor2013114df1.pdf]

Key blots used in figure 2

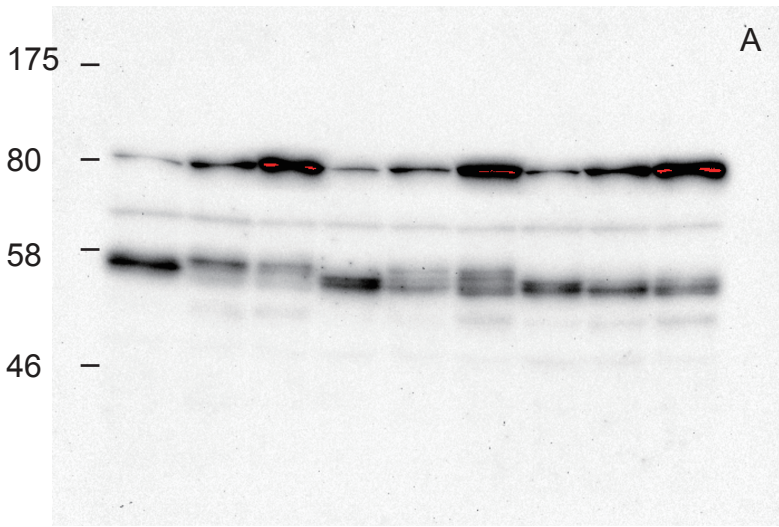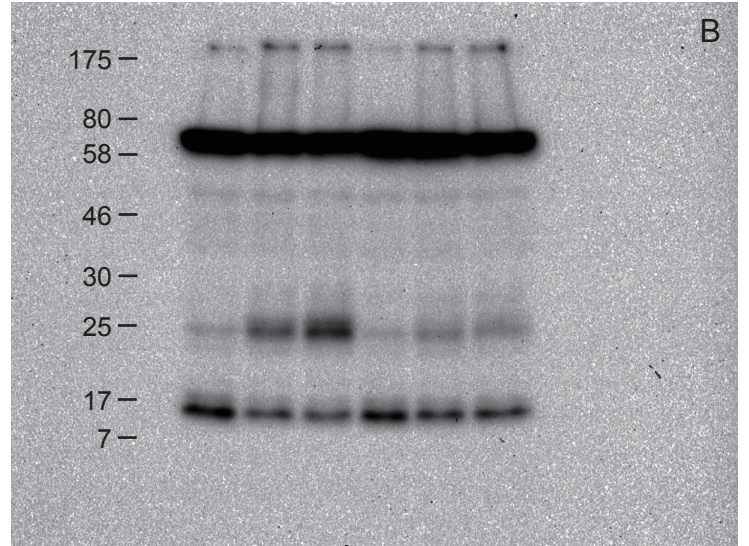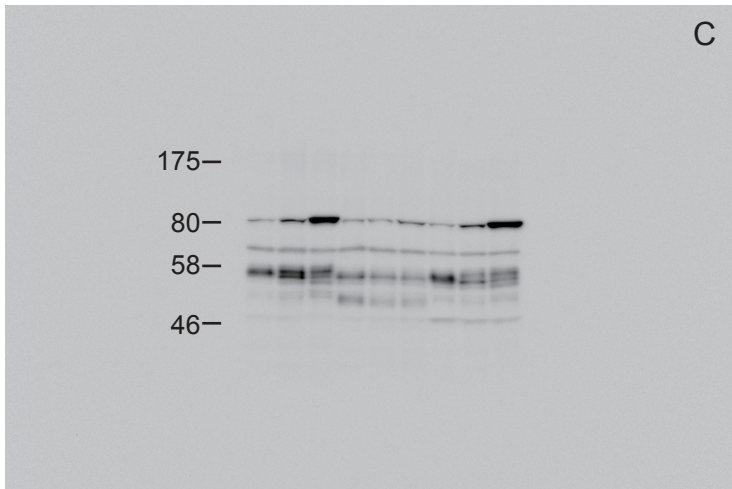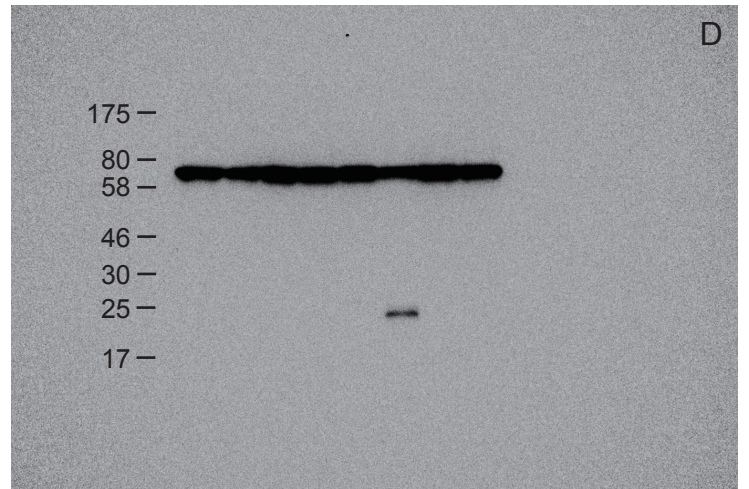

Supplement: embor2013114df2.pdf [file embor2013114df2.pdf]

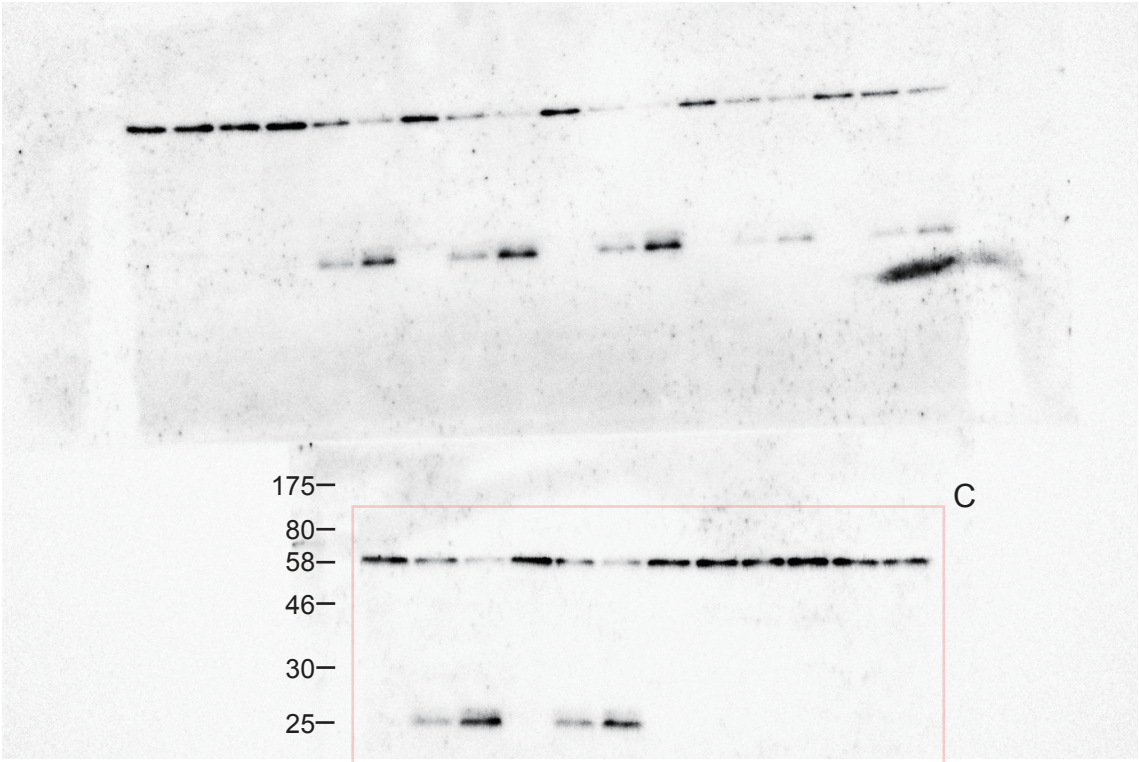

Supplement: embor2013114df3.pdf [file embor2013114df3.pdf]

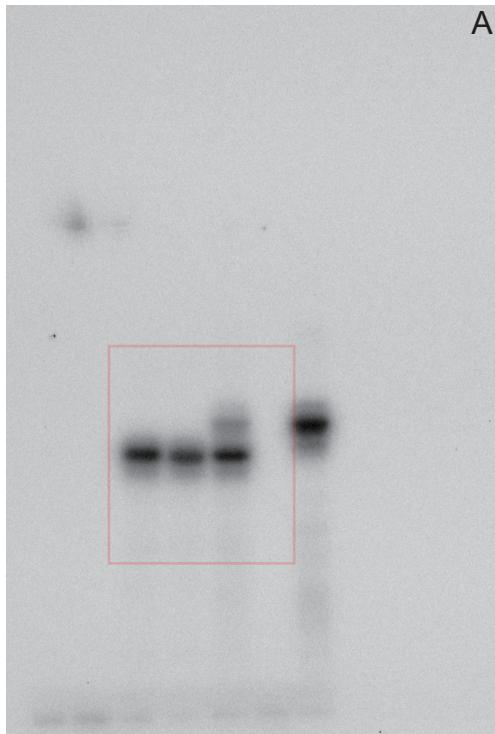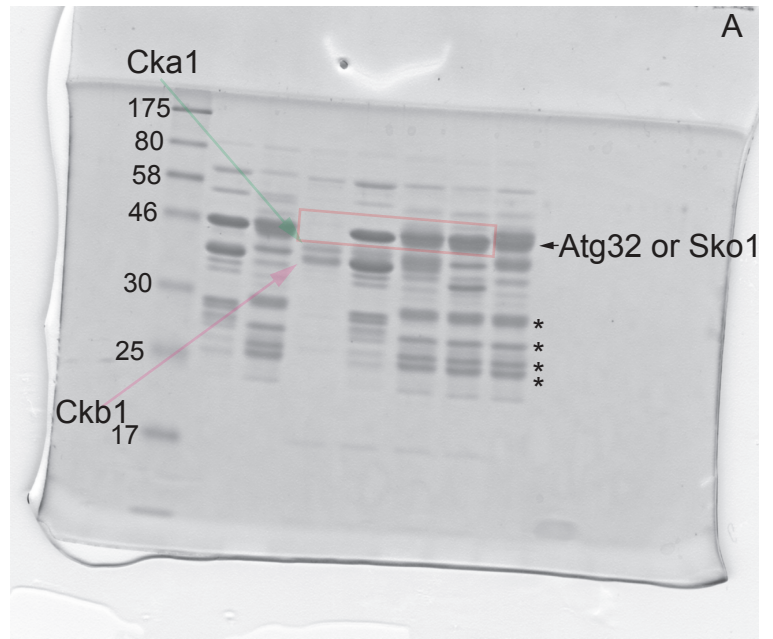

\* degraded GST-Atg32

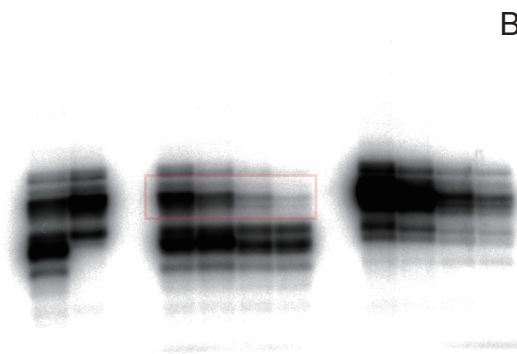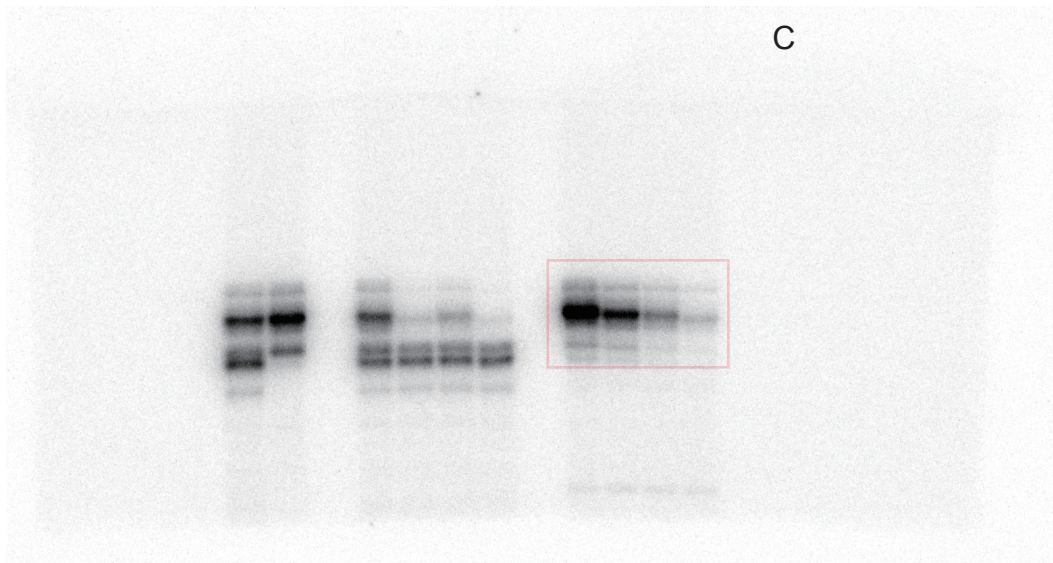

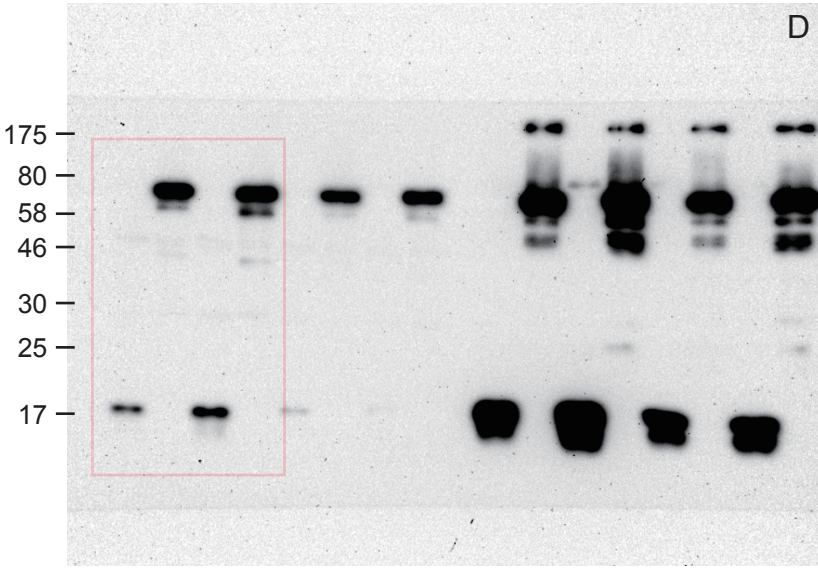

long exposure

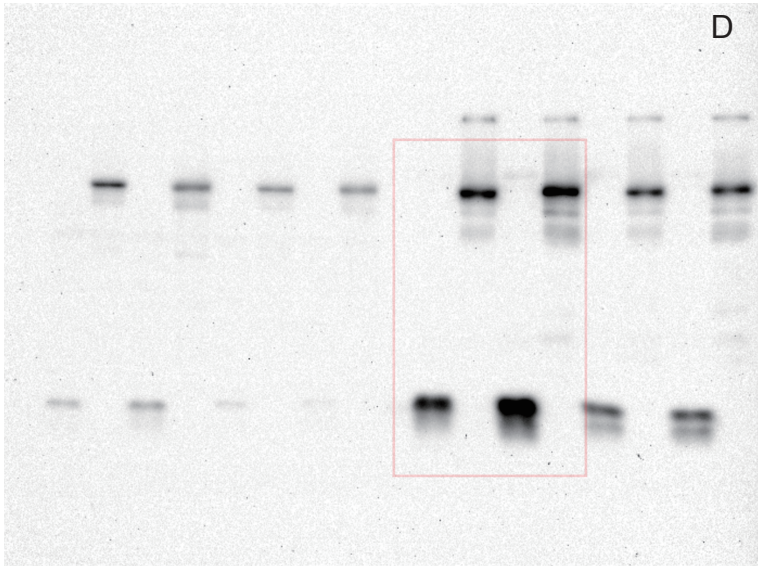

short exposure

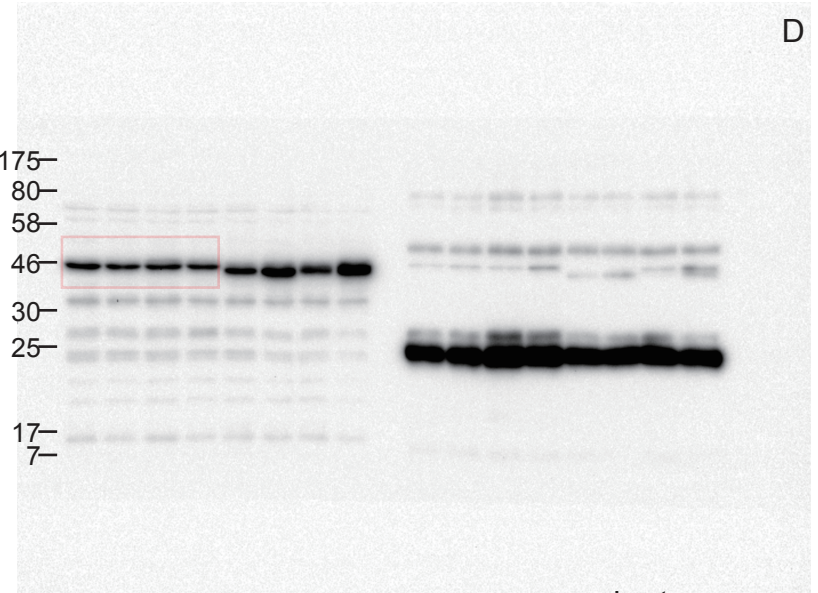

short exposure

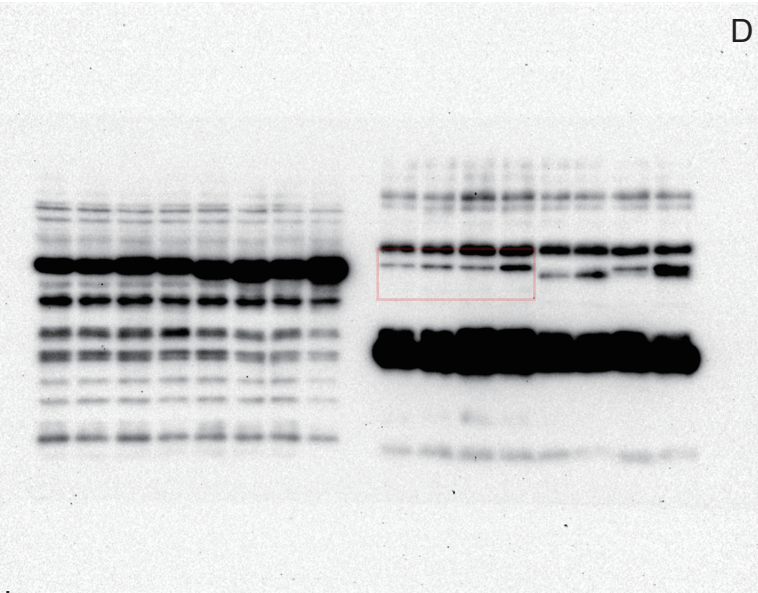

long exposure

Supplement: embor2013114df4.pdf [file embor2013114df4.pdf]
